# Supplementary material for: Green chemistry: solvent- and metal-free Prins cyclization. Application to sequential reactions
Source: Royal Society of Chemistry journal article supplement (doi:10.1039/c1cc16501a), 2011-10-21

## Supplementary Material (ESI)

### Green chemistry: Solvent- and metal-free Prins cyclization. Application to sequential reactions.

Damien Clarisse,<sup>a</sup> Béatrice Pelotier,<sup>a</sup> Olivier Piva<sup>a</sup> and Fabienne Fache<sup>\*a</sup>

Université de Lyon, Université Lyon 1, ICBMS, équipe SURCOOF, CNRS, UMR 5246, Bât. Raulin, 43 Bd du 11 Nov. 1918, 69622 Villeurbanne cedex France. Fax: 33 472448136; Tel: 33472448521; E-mail: fache@univ-lyon1.fr.

### Supplementary informations

<sup>1</sup>H and <sup>13</sup>C NMR spectra were measured in CDCl<sub>3</sub> on a Bruker AC 300 or 400 spectrometers. Mass spectra were recorded on a Finigan-MAT 95 XL instrument; IR spectra were recorded on a Nicolet IR100. Melting points were measured with a B-540 Büchi. Column chromatography was carried out with silica gel 60A 40-63 μm (SDS). All the commercially available products were used as received, without purification or distillation.

#### Table 1

Products **3a** and **3b**: P. O. Miranda, R. M. Carballo, M. A. Ramírez, V. S. Martín and J. I. Padrón, *Arkivoc*, 2007, **iv**, 331.

Product **3c**, **3e** and **3h cis**, : J. S. Yadav, B. V. S. Reddy, M. K. Gupta and S. K. Biswas, *Synthesis*, 2004, 2711.

Product **3d**: J. Li and C.-J. Li, *Tetrahedron Lett.*, 2001, **42**, 793.

Product **3n cis** and **3o cis**: J. S. Yadav, B. V. S. Reddy, M. D. Reddy, N. Niranjana and A. R. Prasad, *Eur. J. Org. Chem.*, **2003**, 1779.

#### **3f: 4-bromo-2-phenyltetrahydro-2H-pyran**

85/15 *cis/trans* mixture. Yellow oil. <sup>1</sup>H NMR: (300 MHz, CDCl<sub>3</sub>) δ 7.54 – 7.19 (5H, m), 4.93 (0.15H, dd, *J* = 10.4, 2.4 Hz), 4.81 (0.15H, tt, *J* = 3.3, 3.0 Hz), 4.44 – 4.24 (1.7H, m), 4.23 – 4.11 (1H, m), 4.04 (0.15H, dd, *J* = 11.8, 4.9 Hz), 3.60 (0.85H, td, *J* = 11.7, 2.7 Hz), 2.56 – 2.47 (0.85H, m), 2.33 – 1.92 (3.15H, m). <sup>13</sup>C NMR: (100 MHz, CDCl<sub>3</sub>) δ 141.9, 141.3, 128.6, 128.5, 128.0, 127.7, 126.0, 125.9, 80.2, 74.4, 68.3, 63.5, 50.3, 46.6, 45.6, 41.8, 37.7, 34.0. IR: 3031, 3060, 2960, 2923, 2851, 1603, 1452, 1249, 1081, 849, 757, 699, 555 cm<sup>-1</sup>.

#### **3g: 4-iodo-2-phenyltetrahydro-2H-pyran**

70/30 *cis/trans* mixture. Brown oil. <sup>1</sup>H NMR: (300 MHz, CDCl<sub>3</sub>) δ 7.45 – 7.19 (5H, m), 4.97 – 4.91 (0.3H, m), 4.85 (0.3H, dd, *J* = 10.5, 2.0 Hz), 4.51 – 4.27 (1.4H, m), 4.14 – 3.96 (1.3H, m), 3.69 – 3.50 (0.7H, m), 2.63 – 2.51 (0.7H, m), 2.41 – 2.16 (2.3H, m), 2.01 – 1.82 (1H, m). <sup>13</sup>C NMR: (75 MHz, CDCl<sub>3</sub>) δ 141.8, 141.2, 128.6, 128.5, 127.9, 127.7, 126.0, 125.8, 81.3, 75.7, 69.5, 64.8, 47.6, 42.8, 39.6, 35.2, 30.7, 22.2. IR: 3062, 2955, 2848 1602, 1452, 1247, 1079, 756 cm<sup>-1</sup>. HRMS: (CI M<sup>+</sup>) 288.0002 (calcd: 288.0006).

### 3h: *trans*-4-chloro-2-(4-nitrophenyl)tetrahydro-2H-pyran

Yellow solid.  $^1\text{H NMR}$ : (300 MHz,  $\text{CDCl}_3$ )  $\delta$  8.19 (2H, d,  $J = 8.7$  Hz), 7.51 (2H, d,  $J = 8.7$  Hz), 4.98 (1H, d,  $J = 9.9$  Hz), 4.69 – 4.63 (1H, m), 4.15 (1H, td,  $J = 11.8, 1.8$  Hz), 4.03 (1H, dd,  $J = 11.8, 5.0$  Hz), 2.29 – 2.07 (2H, m), 2.04 – 1.83 (2H, m).  $^{13}\text{C NMR}$ : (75 MHz,  $\text{CDCl}_3$ )  $\delta$  149.5, 147.4, 126.6, 123.7, 72.8, 62.8, 55.9, 41.5, 33.2. **IR**: 3071, 3030, 2963, 2929, 2854, 1607, 1519, 1347, 1251, 1084, 852, 752, 698, 562  $\text{cm}^{-1}$ . **mp**: 77-78 °C. **HRMS**: ( $\text{CI M}^+$ ) 241.0500 (calcd: 241.0506).

### 3i: *cis*-4-chloro-2-(2-nitrophenyl)tetrahydro-2H-pyran

Yellow solid.  $^1\text{H NMR}$ : (300 MHz,  $\text{CDCl}_3$ )  $\delta$  7.94 (1H, d,  $J = 7.8$  Hz), 7.80 (1H, d,  $J = 7.8$  Hz), 7.65 (1H, t,  $J = 7.8$  Hz), 7.43 (1H, t,  $J = 7.8$  Hz), 4.92 (1H, dd,  $J = 11.5, 1.5$  Hz), 4.29 – 4.11 (2H, m), 3.60 (1H, td,  $J = 12.4, 2.0$  Hz), 2.69 – 2.60 (1H, m), 2.22 – 2.15 (1H, m), 1.99 (1H, qd,  $J = 12.4, 4.9$  Hz), 1.75 (1H, q,  $J = 11.5$  Hz).  $^{13}\text{C NMR}$ : (75 MHz,  $\text{CDCl}_3$ )  $\delta$  147.3, 136.9, 133.8, 128.5, 128.2, 124.5, 75.0, 67.5, 55.2, 44.1, 36.9. **IR**: 3111, 3077, 2964, 2923, 2855, 1611, 1526, 1347, 1249, 1081, 863, 745, 565  $\text{cm}^{-1}$ . **mp**: 74-75 °C. **HRMS**: ( $\text{ESI M}+\text{Na}$ ) 264.0391 (calcd: 264.0398).

### 3i: *trans*-4-chloro-2-(2-nitrophenyl)tetrahydro-2H-pyran

Yellow solid.  $^1\text{H NMR}$ : (300 MHz,  $\text{CDCl}_3$ )  $\delta$  7.89 (1H, dd,  $J = 7.8, 0.9$  Hz), 7.77 (1H, d,  $J = 7.8$  Hz), 7.62 (1H, td,  $J = 7.8, 0.9$  Hz), 7.41 (1H, t,  $J = 7.8$  Hz), 5.43 (1H, dd,  $J = 10.7, 1.8$  Hz), 4.65 (1H, tt,  $J = 3.2, 3.0$  Hz), 4.14 (1H, td,  $J = 11.9, 2.0$  Hz), 3.99 (1H, dd,  $J = 11.9, 5.1$  Hz), 2.40 (1H, ddd,  $J = 14.2, 3.0, 1.8$  Hz), 2.21 (1H, m), 2.01 – 1.82 (2H, m).  $^{13}\text{C NMR}$ : (75 MHz,  $\text{CDCl}_3$ )  $\delta$  147.7, 137.4, 133.5, 128.3, 128.2, 124.3, 70.0, 63.1, 55.8, 40.6, 33.4. **IR**: 3099, 3060, 2961, 2917, 2866, 1611, 1525, 1355, 1244, 1070, 860, 743, 573  $\text{cm}^{-1}$ . **mp**: 82-84 °C. **HRMS**: ( $\text{ESI M}+\text{Na}$ ) 264.0391 (calcd: 264.0398).

### 3j: *cis*-4-chloro-2-(4-methoxyphenyl)tetrahydro-2H-pyran

Yellow oil.  $^1\text{H NMR}$ : (300 MHz,  $\text{CDCl}_3$ )  $\delta$  7.26 (2H, d,  $J = 8.6$  Hz), 6.88 (2H, d,  $J = 8.6$  Hz), 4.28 (1H, dd,  $J = 11.4, 2.0$  Hz), 4.23 – 4.06 (2H, m), 3.80 (3H, s), 3.59 (1H, td,  $J = 12.2, 2.2$  Hz), 2.39 – 2.29 (1H, m), 2.25 – 2.11 (1H, m), 2.06 – 1.82 (2H, m).  $^{13}\text{C NMR}$ : (100 MHz,  $\text{CDCl}_3$ )  $\delta$  159.3, 133.5, 127.2, 113.9, 113.8, 79.0, 67.4, 55.9, 55.3, 44.6, 36.9. **IR**: 3030, 2959, 2838, 1515, 1248, 1080, 1030, 829  $\text{cm}^{-1}$ . **HRMS**: ( $\text{ESI M}+\text{Na}$ ) 249.0652 (calcd: 249.0653).

### 3k: *cis*-5-(4-chlorotetrahydro-2H-pyran-2-yl)-6-nitrobenzo[d][1,3]dioxole

Yellow solid.  $^1\text{H NMR}$ : (300 MHz,  $\text{CDCl}_3$ )  $\delta$  7.47 (1H, s), 7.22 (1H, s), 6.09 (2H, s), 4.94 (1H, dd,  $J = 10.8, 1.8$  Hz), 4.28 – 4.06 (2H, m), 3.59 (1H, td,  $J = 12.3, 2.2$  Hz), 2.60 (1H, ddt,  $J = 12.3, 4.0, 1.8$  Hz), 2.24 – 2.14 (1H, m), 1.97 (1H, qd,  $J = 12.3, 5.0$  Hz), 1.67 (1H, dt,  $J = 12.3, 10.8$  Hz).  $^{13}\text{C NMR}$ : (75 MHz,  $\text{CDCl}_3$ )  $\delta$  152.6, 147.3, 141.1, 134.8, 107.0, 105.2, 103.1, 75.3, 67.4, 55.1, 44.1, 36.9. **IR**: 3071, 2961, 2922, 2852, 1618, 1521, 1505, 1484, 1337, 1260, 1037, 761, 583  $\text{cm}^{-1}$ . **mp**: 124-125°C. **HRMS**: ( $\text{ESI M}+\text{H}$ ) 286.0480 (calcd: 286.0477).

### 3k: *trans*-5-(4-chlorotetrahydro-2H-pyran-2-yl)-6-nitrobenzo[d][1,3]dioxole

Yellow oil.  $^1\text{H NMR}$ : (300 MHz,  $\text{CDCl}_3$ )  $\delta$  7.46 (1H, s), 7.22 (1H, s), 6.09 (2H, s), 5.46 (1H, dd,  $J = 10.7, 1.3$  Hz), 4.68 – 4.57 (1H, m), 4.14 (1H, td,  $J = 11.8, 2.2$  Hz), 3.99 (1H, dd,  $J =$

11.8, 4.9 Hz), 2.44 – 2.35 (1H, m), 2.27 – 2.11 (1H, m), 1.92 – 1.78 (2H, m). **<sup>13</sup>C NMR:** (75 MHz, CDCl<sub>3</sub>) δ 152.4, 147.1, 137.9, 135.4, 107.1, 105.2, 103.0, 70.2, 63.1, 55.8, 40.6, 33.5. **IR:** 3067, 2963, 2925, 2853, 1618, 1521, 1505, 1484, 1337, 1260, 1037, 761, 583 cm<sup>-1</sup>. **HRMS:** (CI M<sup>+</sup>) 285.0399 (calcd: 285.0399).

### **3l: *cis*-4-chloro-2-(4-methyl-3-nitrophenyl)tetrahydro-2H-pyran**

White solid. **<sup>1</sup>H NMR:** (300 MHz, CDCl<sub>3</sub>) δ 7.97 (1H, d, *J* = 1.6 Hz), 7.47 (1H, dd, *J* = 8.0, 1.6 Hz), 7.32 (1H, d, *J* = 8.0 Hz), 4.39 (1H, dd, *J* = 11.5, 1.8 Hz), 4.28 – 4.06 (2H, m), 3.60 (1H, td, *J* = 12.2, 2.2 Hz), 2.59 (3H, s), 2.47 – 2.32 (1H, m), 2.24 – 2.09 (1H, m), 2.07 – 1.94 (1H, m), 1.83 (1H, dt, *J* = 12.0, 11.5 Hz). **<sup>13</sup>C NMR:** (75 MHz, CDCl<sub>3</sub>) δ 149.1, 140.8, 132.8, 132.9, 130.2, 121.9, 77.6, 67.3, 55.2, 44.3, 36.6, 20.1. **IR:** 3071, 2964, 2932, 2855, 1531, 1347, 1251, 1085, 840, 760, 579 cm<sup>-1</sup>. **mp:** 77-78 °C. **HRMS:** (ESI M+Na) 278.0547 (calcd: 278.0554).

### **3l: *trans*-4-chloro-2-(4-methyl-3-nitrophenyl)tetrahydro-2H-pyran**

Yellow oil. **<sup>1</sup>H NMR:** (300 MHz, CDCl<sub>3</sub>) δ 7.98 (1H, d, *J* = 1.6 Hz), 7.46 (1H, dd, *J* = 8.0, 1.6 Hz), 7.31 (1H, d, *J* = 8.0 Hz), 4.92 (1H, dd, *J* = 11.0, 2.0 Hz), 4.66 (1H, tt, *J* = 3.6, 2.9 Hz), 4.14 (1H, td, *J* = 11.9, 2.2 Hz), 4.02 (1H, dt, *J* = 11.9, 4.8 Hz), 2.58 (3H, s), 2.28 – 2.09 (2H, m), 2.08 – 1.84 (2H, m). **<sup>13</sup>C NMR:** (100 MHz, CDCl<sub>3</sub>) δ 149.4, 141.7, 132.9, 132.8, 130.4, 122.2, 72.4, 62.9, 56.0, 41.3, 33.3, 20.3. **IR:** 3073, 2961, 2867, 1531, 1347, 1266, 1074, 836, 757, 579 cm<sup>-1</sup>. **HRMS:** (ESI M+Na) 278.0550 (calcd: 278.0554).

### **3m: *cis*-4-chloro-2-(2-chloro-6-nitrophenyl)tetrahydro-2H-pyran**

White solid. **<sup>1</sup>H NMR:** (300 MHz, CDCl<sub>3</sub>) δ 7.52 (1H, dd, *J* = 7.8, 1.6 Hz), 7.43 – 7.30 (2H, m), 4.85 (1H, dd, *J* = 10.8, 3.0 Hz), 4.19 – 4.03 (2H, m), 3.49 (1H, td, *J* = 12.1, 2.4 Hz), 2.53 – 2.29 (2H, m), 2.14 – 1.86 (2H, m). **<sup>13</sup>C NMR:** (100 MHz, CDCl<sub>3</sub>) δ 151.2, 133.3, 132.4, 131.2, 129.2, 122.7, 75.9, 67.6, 54.9, 39.8, 36.0. **IR:** 3090, 2962, 2929, 2852, 1540, 1371, 1251, 1084, 799, 757, 568 cm<sup>-1</sup>. **mp:** 97-99°C. **HRMS:** (ESI M+Na) 298.0004 (calcd: 298.0008).

### **3m: *trans*-4-chloro-2-(2-chloro-6-nitrophenyl)tetrahydro-2H-pyran**

White oil. **<sup>1</sup>H NMR:** (300 MHz, CDCl<sub>3</sub>) δ 7.51 (1H, dd, *J* = 7.8, 0.9 Hz), 7.41 – 7.28 (2H, m), 5.44 (1H, dd, *J* = 11.3, 2.3 Hz), 4.67 (1H, m), 4.06 (1H, td, *J* = 12.0, 1.9 Hz), 3.91 (1H, dd, *J* = 12.0, 4.7 Hz), 2.58 (1H, ddd, *J* = 14.4, 11.3, 3.1 Hz), 2.25 – 2.11 (2H, m), 1.86 – 1.75 (1H, m). **<sup>13</sup>C NMR:** (100 MHz, CDCl<sub>3</sub>) δ 151.4, 133.5, 132.3, 132.2, 128.9, 122.6, 71.1, 62.9, 56.1, 36.8, 32.7. **IR:** 3086, 2967, 2870, 1541, 1372, 1245, 1071, 798, 759, 731, 569 cm<sup>-1</sup>. **HRMS:** (ESI M+H) 276.0189 (calcd: 276.0189).

### **3n: *trans*-4-chloro-2,6-diphenyltetrahydro-2H-pyran**

White solid. **<sup>1</sup>H NMR:** (400 MHz, CDCl<sub>3</sub>) δ 7.43 (4H, d, *J* = 7.6 Hz), 7.34 (4H, t, *J* = 7.6 Hz), 7.29 – 7.22 (2H, m), 5.12 (2H, d, *J* = 11.1 Hz), 4.84 – 4.62 (1H, m), 2.24 – 2.16 (2H, m), 2.07 (2H, ddd, *J* = 14.4, 11.1, 3.1 Hz). **<sup>13</sup>C NMR:** (100 MHz, CDCl<sub>3</sub>) δ 142.2, 128.5, 127.7, 126.0, 74.1, 57.0, 41.2. **IR:** 3064, 2955, 2919, 2851, 1495, 1453, 1266, 1060, 755, 697 cm<sup>-1</sup>. **mp:** 58-60°C. **HRMS:** (ESI MH<sup>+</sup>) 273.1039 (calcd: 273.1041).

### **3o: 4-chloro-2,6-dicyclohexyltetrahydro-2H-pyran**

80/20 *Cis/trans* mixture. White oil.  $^1\text{H NMR}$ : (300 MHz,  $\text{CDCl}_3$ )  $\delta$  4.65 – 4.61 (0.2H, m), 3.99 (0.8H, tt,  $J = 11.8, 4.5$  Hz), 3.47 (0.4H, dd,  $J = 10.2, 8.1$  Hz), 2.93 (1.6H, ddd,  $J = 11.1, 6.9, 1.3$  Hz), 2.14 (1.6H, dd,  $J = 12.3, 4.5$  Hz), 2.05 – 1.87 (2.4H, m), 1.86 – 0.78 (22H, m).  $^{13}\text{C NMR}$ : (75 MHz,  $\text{CDCl}_3$ )  $\delta$  81.2, 75.9, 57.8, 43.0, 42.8, 40.1, 36.9, 29.2, 29.0, 26.7, 26.3, 26.1. **IR**: 2924, 2852, 1449, 1361, 1265, 1069, 840, 804, 763  $\text{cm}^{-1}$ .

## Table 2

### Sequential Prins-Bartoli reaction:

Homoallylic alcohol (0.5 mmol), aldehyde (0.5 mmol) and trimethylsilyl chloride (0.75 mmol, 100  $\mu\text{l}$ ) were stirred at room temperature for the required time (generally 2 h). THF (7 mL) and alkyl magnesium bromide derivative (2.5 mmol) were added to the reaction mixture at  $-40^\circ\text{C}$ . After 30 min of stirring, the reaction was quenched with  $\text{NH}_4\text{Cl}$  and extracted with diethyl ether (3 x 10 mL). The combined organic layers were dried over  $\text{MgSO}_4$ , concentrated *in vacuo* and purified by column chromatography on silica gel (EtOAc/ petroleum ether: 10/90).

### 5a: *cis*-7-(4-chlorotetrahydro-2H-pyran-2-yl)-1H-indole

Yellow oil.  $^1\text{H NMR}$ : (300 MHz,  $\text{CDCl}_3$ )  $\delta$  9.04 (1H, bs), 7.59 (1H, d,  $J = 7.8$  Hz), 7.23 (1H, t,  $J = 2.9$  Hz), 7.07 (1H, dd,  $J = 7.8, 7.3$  Hz), 6.94 (1H, d,  $J = 7.3$  Hz), 6.56 (1H, dd,  $J = 2.9, 2.2$  Hz), 4.73 (1H, dd,  $J = 11.4, 2.1$  Hz), 4.35 – 4.14 (2H, m), 3.67 (1H, td,  $J = 12.2, 2.2$  Hz), 2.54 – 2.45 (1H, m), 2.30 – 1.98 (3H, m).  $^{13}\text{C NMR}$ : (75 MHz,  $\text{CDCl}_3$ )  $\delta$  133.4, 129.1, 124.4, 123.9, 120.3, 119.5, 118.6, 102.4, 80.3, 67.6, 55.4, 43.7, 37.2. **IR**: 3449, 3055, 2961, 2918, 2852, 1436, 1338, 1250, 1139, 1077, 795, 732  $\text{cm}^{-1}$ . **HRMS**: (ESI M+H) 236.0837 (calcd: 236.0837).

### 5b: *cis*-6-chloro-7-(4-chlorotetrahydro-2H-pyran-2-yl)-1H-indole

Yellow oil.  $^1\text{H NMR}$ : (400 MHz, Acetone- $d_6$ )  $\delta$  10.39 (1H, bs), 7.48 (1H, d,  $J = 8.4$  Hz), 7.30 (1H, t,  $J = 3.0$  Hz), 7.02 (1H, d,  $J = 8.4$  Hz), 6.47 (1H, dd,  $J = 3.0, 2.2$  Hz), 5.16 (1H, dd,  $J = 11.3, 2.2$  Hz), 4.49 – 4.40 (1H, m), 4.26 (2H, ddd,  $J = 12.0, 4.8, 1.8$  Hz), 3.76 (2H, td,  $J = 12.0, 2.4$  Hz), 2.47 – 2.41 (1H, m), 2.25 – 2.10 (3H, m).  $^{13}\text{C NMR}$ : (100 MHz, Acetone- $d_6$ )  $\delta$  134.8, 129.3, 126.8, 123.9, 122.9, 121.6, 121.2, 102.3, 78.3, 68.2, 56.2, 42.5, 37.7. **IR**: 3455, 2956, 2923, 2854, 1602, 1540, 1443, 1132, 1079, 805, 730  $\text{cm}^{-1}$ . **HRMS**: (ESI M+H) 270.0046 (calcd: 270.0047).

### 5b: *trans*-6-chloro-7-(4-chlorotetrahydro-2H-pyran-2-yl)-1H-indole

Yellow oil.  $^1\text{H NMR}$ : (300 MHz, Acetone- $d_6$ )  $\delta$  10.40 (1H, bs), 7.47 (1H, d,  $J = 8.4$  Hz), 7.28 (1H, t,  $J = 2.9$  Hz), 7.01 (1H, d,  $J = 8.4$  Hz), 6.46 (1H, dd,  $J = 2.9, 2.2$  Hz), 5.61 (1H, dd,  $J = 10.7, 2.6$  Hz), 4.86 – 4.83 (1H, m), 4.18 – 4.08 (2H, m), 2.54 – 2.41 (1H, m), 2.34 – 1.85 (3H, m).  $^{13}\text{C NMR}$ : (75 MHz, Acetone- $d_6$ )  $\delta$  135.0, 129.0, 126.5, 123.8, 123.3, 121.3, 121.1, 102.1, 73.3, 63.6, 57.7, 38.8, 33.9. **IR**: 3448, 2962, 2922, 2868, 1601, 1539, 1435, 1132, 1069, 920, 806, 731  $\text{cm}^{-1}$ . **HRMS**: (ESI M+H) 270.0450 (calcd: 270.0447).

### 5c: 5-(4-chlorotetrahydro-2H-pyran-2-yl)-8H-[1,3]dioxolo[4,5-g]indole

60/40 *cis/trans* mixture. Yellow oil.  $^1\text{H NMR}$ : (300 MHz, Acetone- $d_6$ )  $\delta$  10.17 (1H, bs), 7.29 – 7.20 (1H, m), 6.77 – 6.66 (1H, m), 6.35 – 6.27 (1H, m), 5.93 (2H, s), 5.11 (0.4H, d,  $J = 11.0$  Hz), 4.80 – 4.70 (1H, m), 4.39 – 4.26 (0.6H, m), 4.17 – 3.88 (1.4 H, m), 3.64 (0.6H, td,  $J =$

12.1, 2.1 Hz), 2.45 – 1.75 (4H, m). <sup>13</sup>C NMR: (100 MHz, Acetone-d<sub>6</sub>) δ 140.3, 140.3, 138.4, 138.4, 133.1, 132.6, 127.2, 127.2, 118.3, 118.3, 115.0, 114.9, 102.5, 102.3, 101.4, 97.2, 97.1, 78.7, 73.6, 67.9, 63.3, 57.9, 56.8, 44.5, 40.3, 37.8, 34.1. HRMS: (ESI M+H) 280.0739 (calcd: 280.0735).

#### 5d: 4-(4-chlorotetrahydro-2H-pyran-2-yl)-7-methyl-1H-indole

80/20 *cis/trans* mixture. Yellow oil. <sup>1</sup>H NMR: (300 MHz, CDCl<sub>3</sub>) δ 8.16 (1H, bs), 7.22 (1H, s), 7.12 – 6.95 (2H, m), 6.73 – 6.63 (1H, m), 5.36 – 5.26 (0.2H, m), 4.71 (1H, m), 4.45 – 4.17 (1.8H, m), 4.07 (0.2H, dd, *J* = 11.7, 4.3 Hz), 3.68 (0.8H, t, *J* = 12.1 Hz), 2.48 (3.8H, m), 2.39 – 1.80 (3.2H, m). <sup>13</sup>C NMR: (75 MHz, CDCl<sub>3</sub>) δ 135.7, 135.6, 131.5, 130.8, 124.9, 124.8, 124.0, 123.9, 122.5, 122.5, 120.1, 119.8, 116.9, 116.6, 101.4, 78.7, 72.9, 67.6, 63.0, 57.1, 56.3, 43.8, 40.6, 37.2, 33.8, 21.2, 16.6. IR: 3417, 3014, 2960, 2927, 2854, 1505, 1446, 1344, 1075, 733 cm<sup>-1</sup>. HRMS: (ESI M+H) 250.0991 (calcd: 250.0993).

#### 5e: 4-(4-chlorotetrahydro-2H-pyran-2-yl)-2,7-dimethyl-1H-indole

70/30 *cis/trans* mixture. Yellow oil. <sup>1</sup>H NMR: (300 MHz, CDCl<sub>3</sub>) δ 7.89 (1H, bs), 7.05 – 6.84 (2H, m), 6.32 (1H, m), 5.22 (0.3H, dd, *J* = 10.1, 2.9 Hz), 4.71 (0.3H, t, *J* = 2.9 Hz), 4.63 (0.7H, dd, *J* = 11.3, 1.8 Hz), 4.31 – 4.13 (1.7H, m), 4.05 (0.3H, dd, *J* = 11.8, 4.7 Hz), 3.66 (0.7H, td, *J* = 12.1, 2.2 Hz), 2.55 – 2.37 (6.7 H, m), 2.37 – 2.0 (3.3H, m). <sup>13</sup>C NMR: (100 MHz, CDCl<sub>3</sub>) δ 135.9, 135.8, 134.9, 134.8, 130.6, 129.8, 125.9, 121.7, 119.3, 119.0, 116.8, 116.5, 99.5, 79.0, 73.0, 67.6, 63.1, 57.2, 56.4, 43.6, 40.4, 37.3, 33.8, 22.8, 16.7, 14.3, 13.9. HRMS: (ESI M+H) 264.1150 (calcd: 264.1150).

#### Prins cyclisation-elimination procedure:

3-Buten-1-ol (0.5 mmol, 36 mg), benzaldehyde (0.5 mmol, 53 mg) and trimethylsilyl bromide (0.75 mmol 106 μL) were stirred at room temperature for 30 min. Then, DMF (1 mL), KI (0.25 mmol, 16.5 mg) and K<sub>2</sub>CO<sub>3</sub> (1.25 mmol, 173 mg) were added and stirred under reflux for 4 hours. Water was added at room temperature and the aqueous phase was extracted with diethyl ether (3 x 10 mL). The combined organic layers were dried over MgSO<sub>4</sub>, concentrated *in vacuo* and purified by column chromatography on silica gel (EtOAc/petroleum ether: 5/95).

Products described in F. Michalek, D. Mädge, J. Rühle and W. Bannwarth, *J. Organomet. Chem.* 2006, **691**, 5172.

#### Prins cyclisation–dehalogenation procedure:

3-Buten-1-ol (0.5 mmol, 36 mg), benzaldehyde (0.5 mmol, 53 mg) and trimethylsilyl chloride (0.75 mmol 100 μL) were stirred at room temperature for 2 hours. Then, toluene (4 mL), Bu<sub>3</sub>SnH (1.25 mmol, 364 mg) and AIBN (0.1 mmol, 17 mg) were added and stirred 5 hours under reflux. The reaction mixture was concentrated *in vacuo* and purified by column chromatography on silica gel (EtOAc/petroleum ether: 5/95).

Product described in Y. Jeong, D.-Y. Kim, Y. Choi and J.-S. Ryu, *Org. Biomol. Chem.*, 2011, **9**, 374.

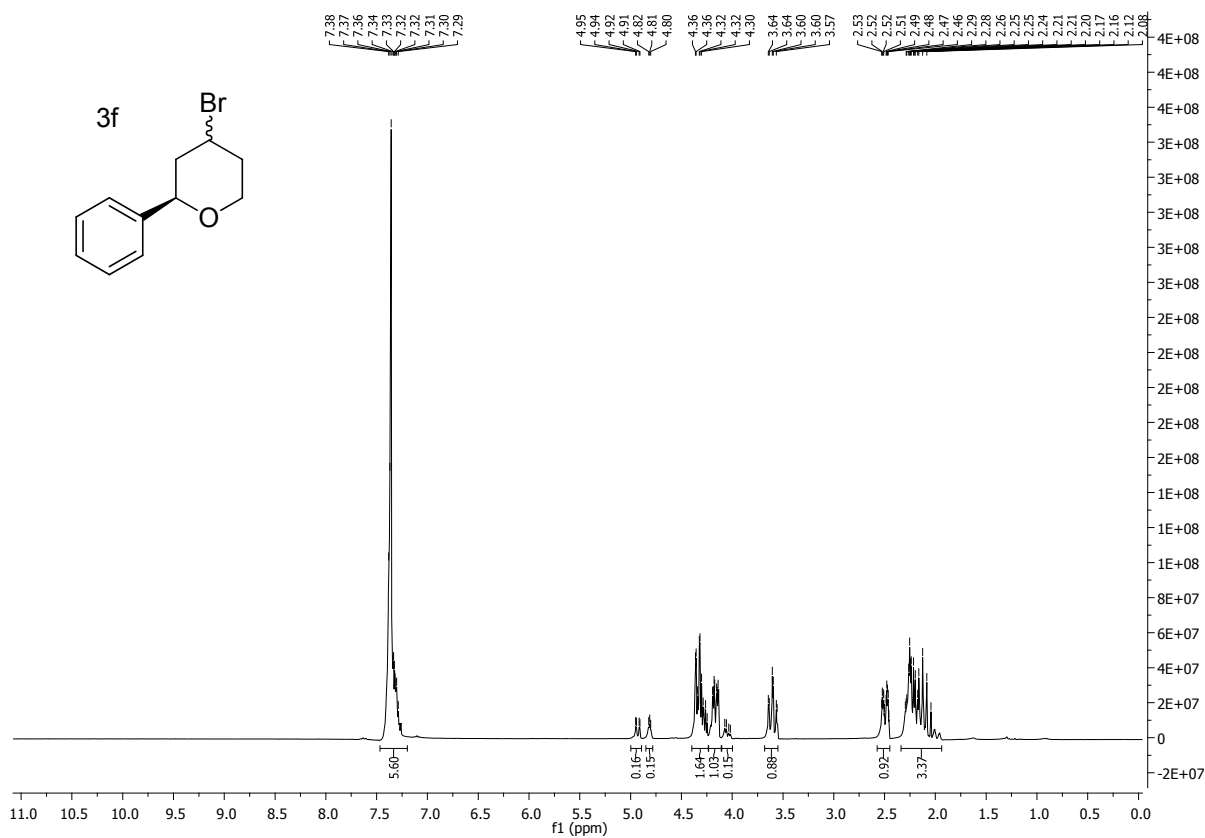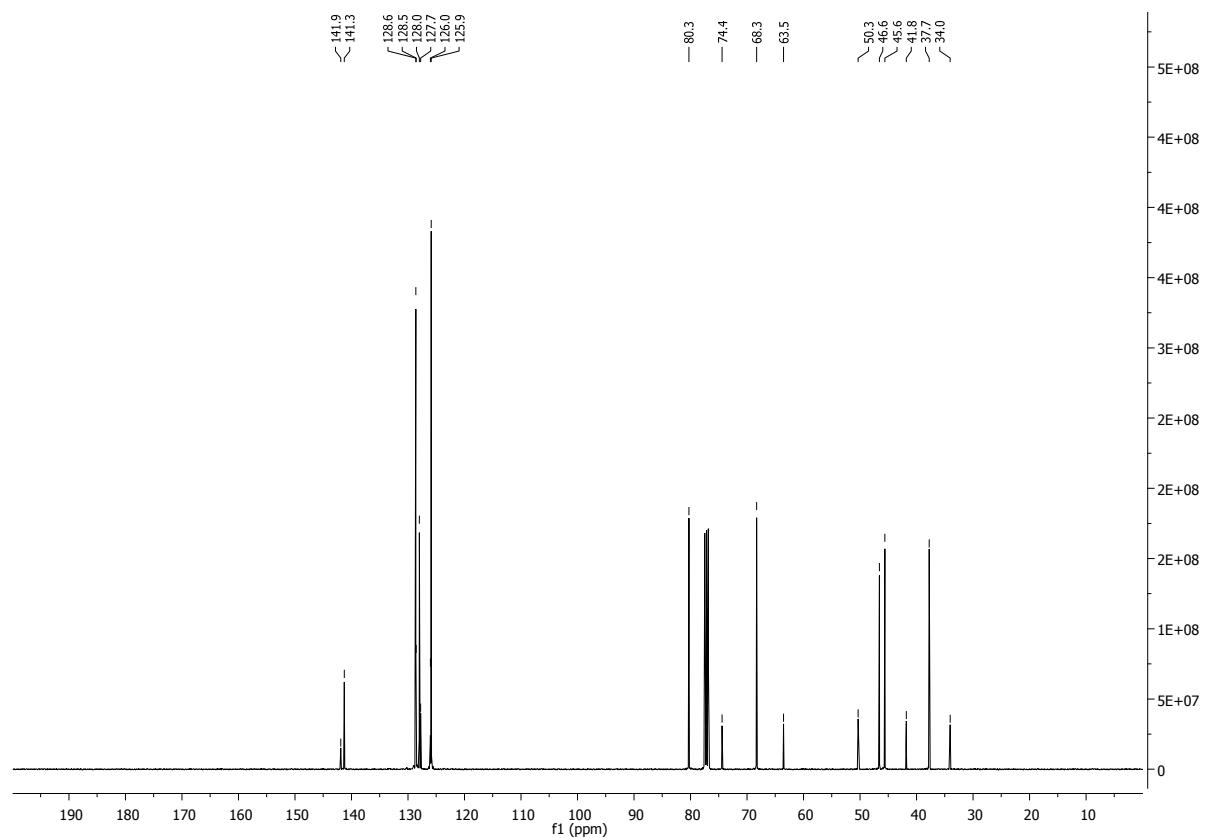

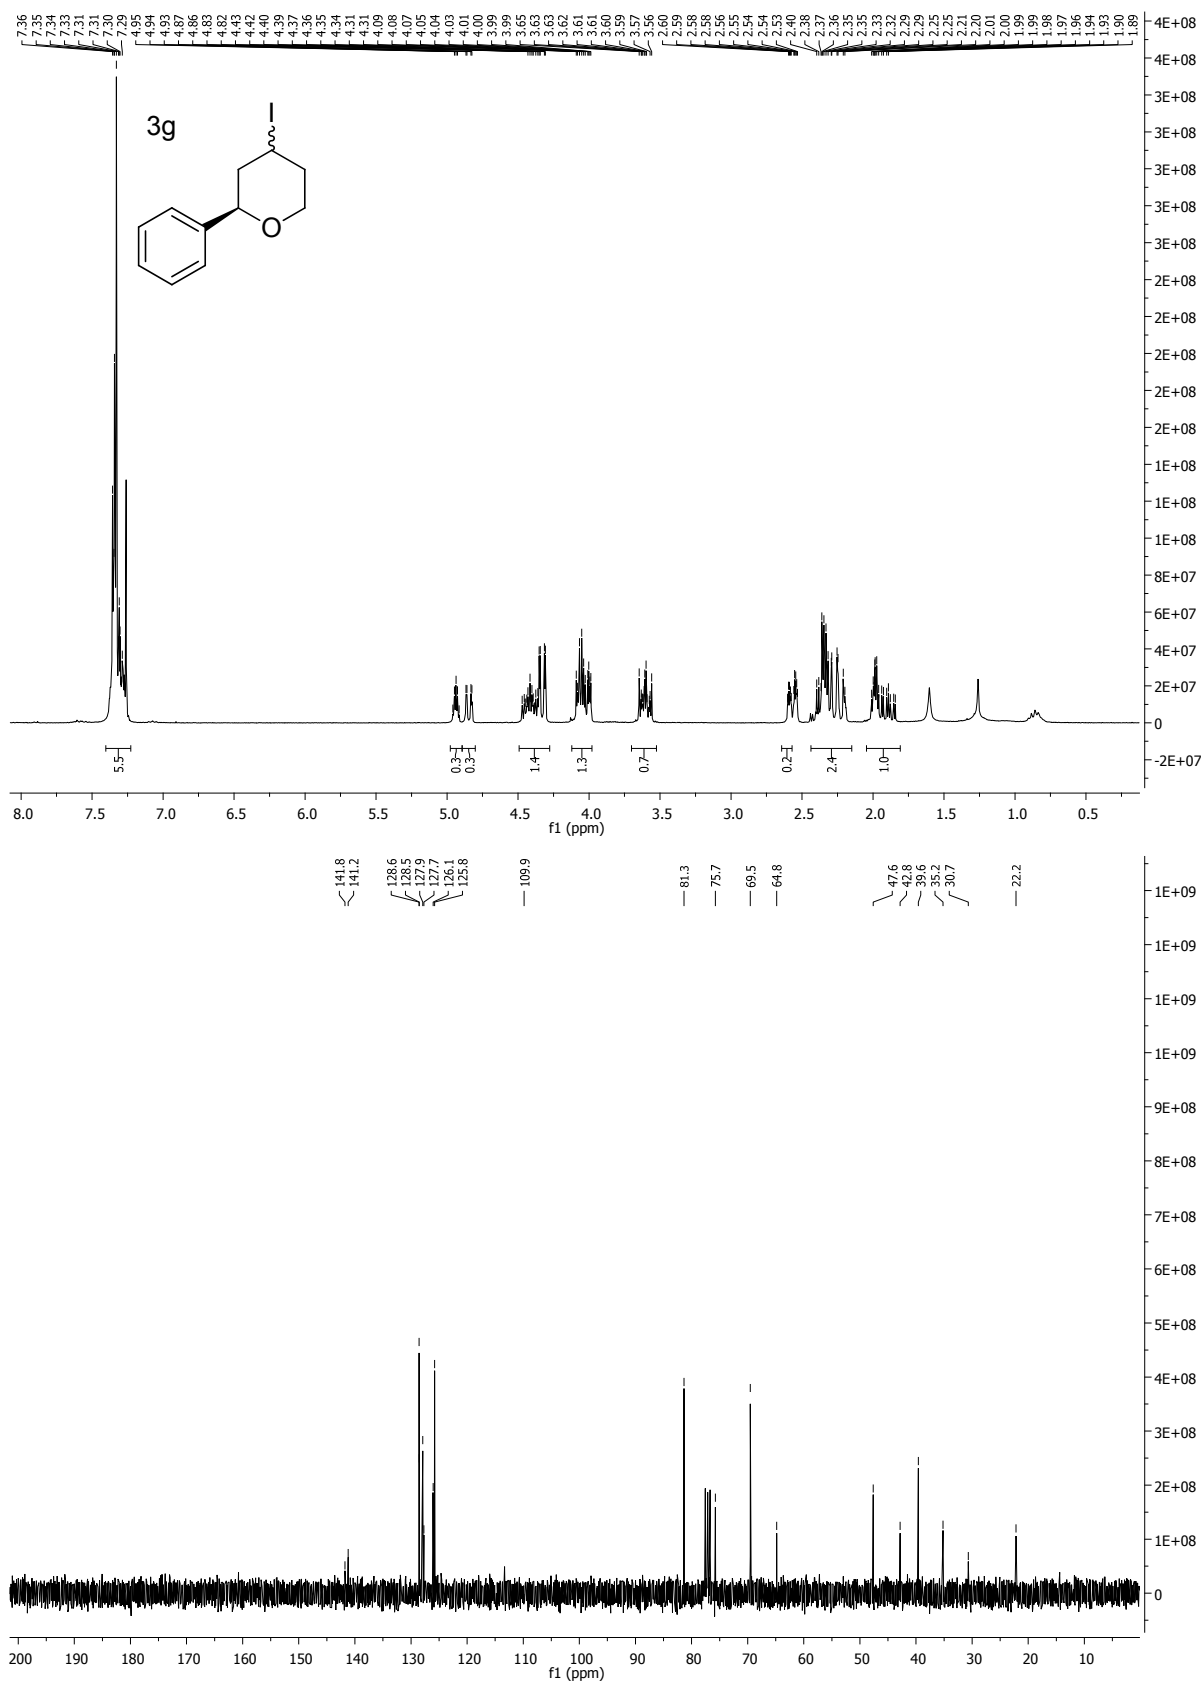

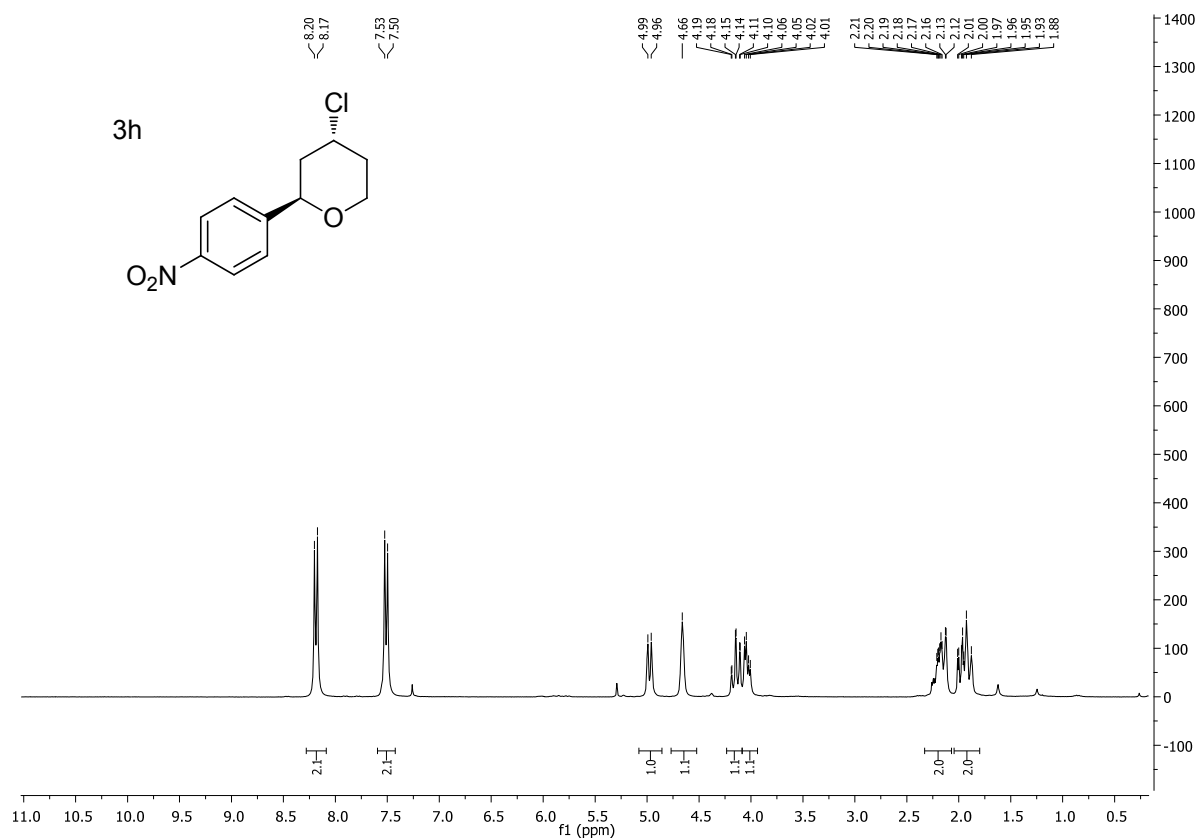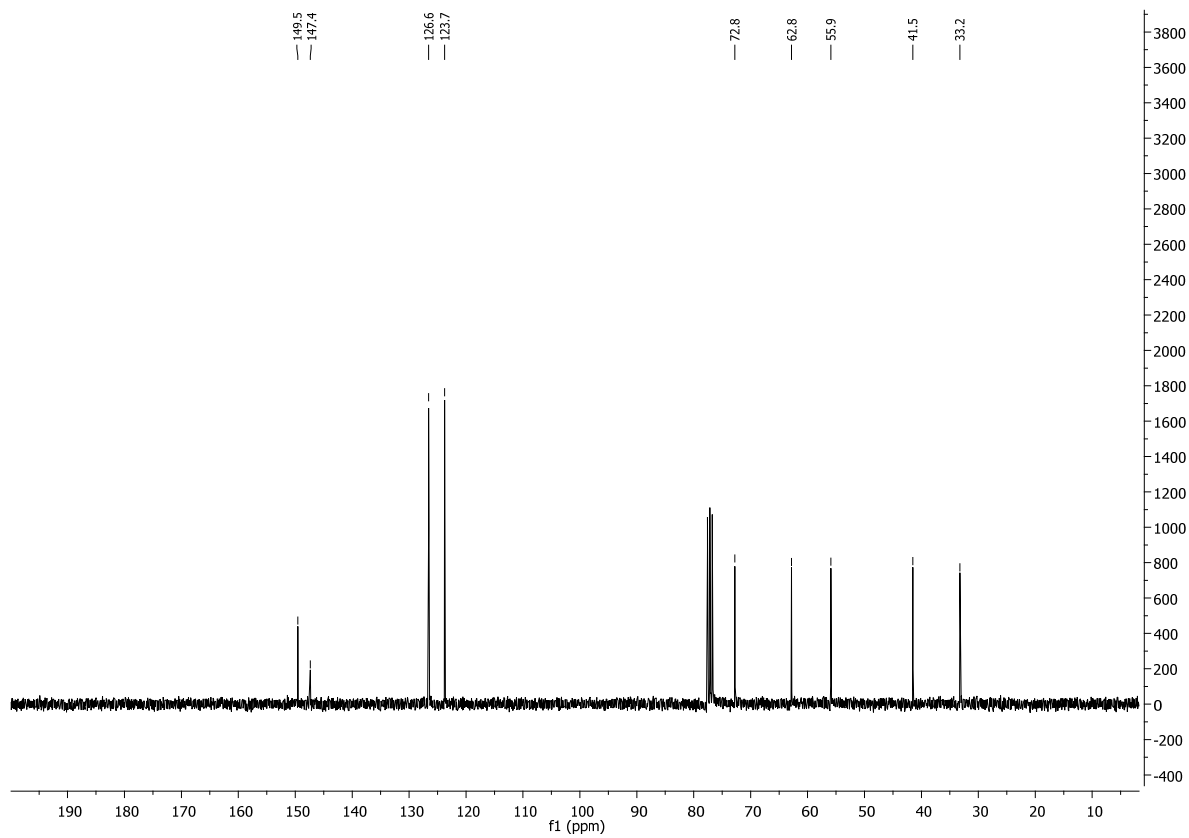



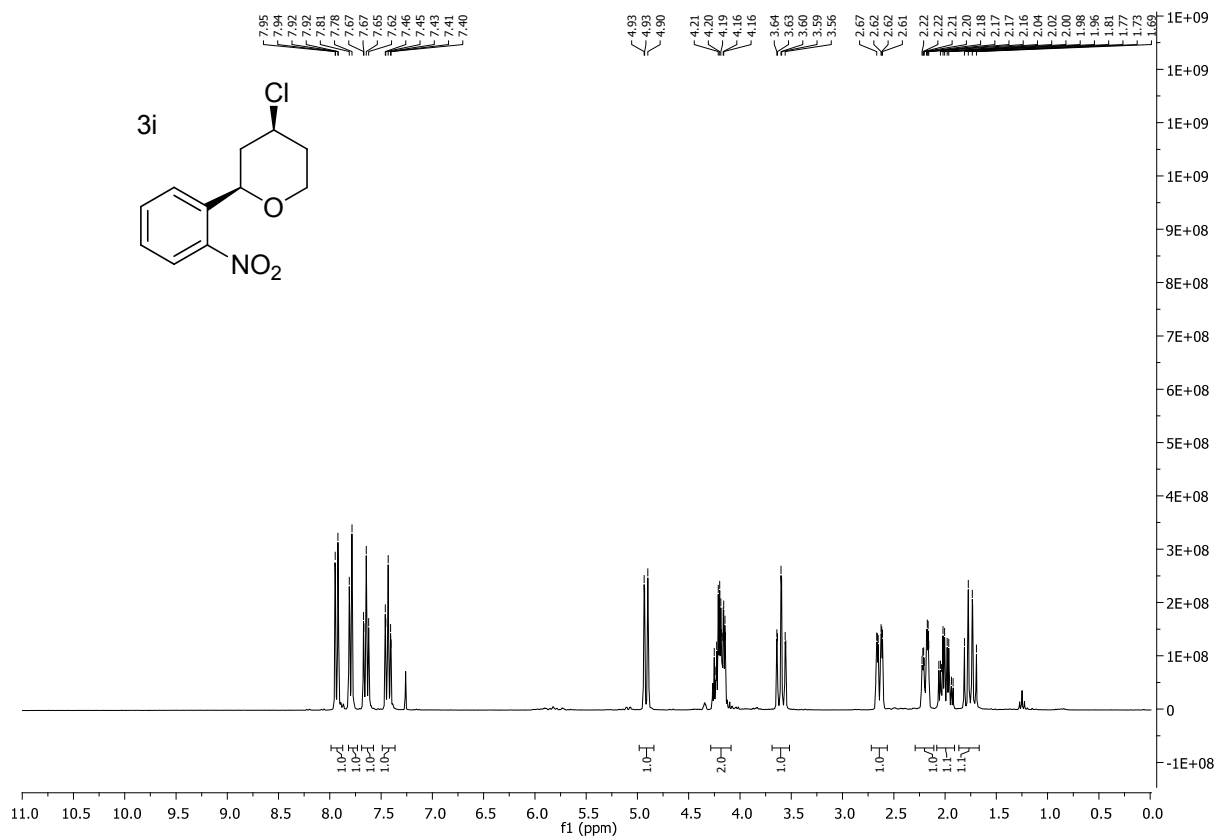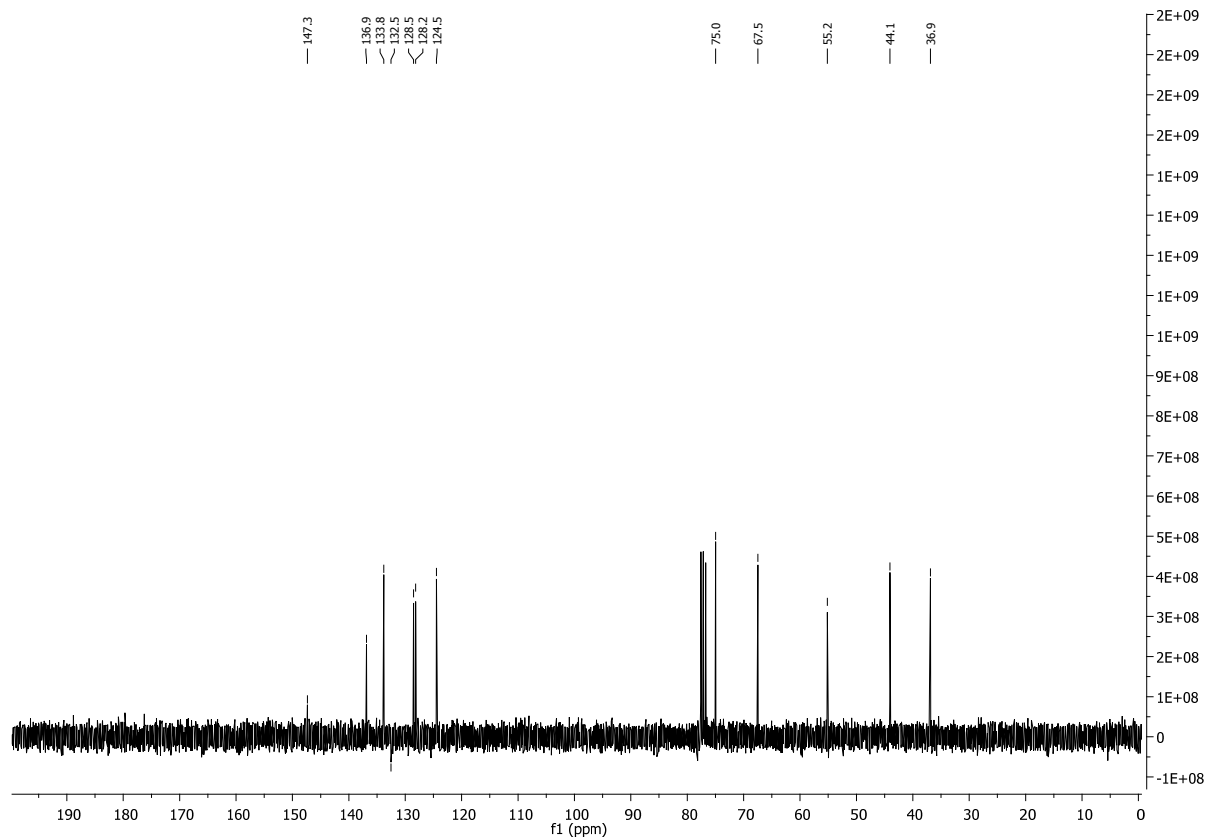

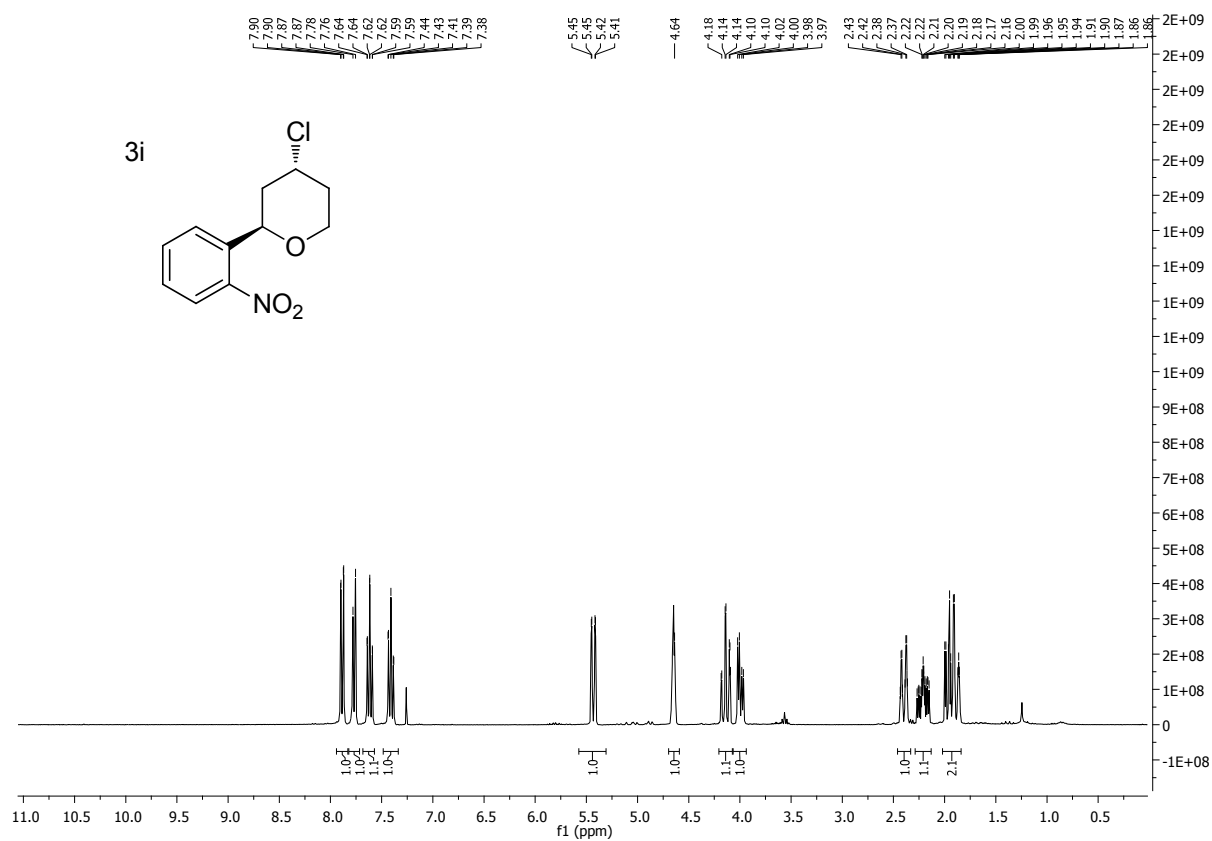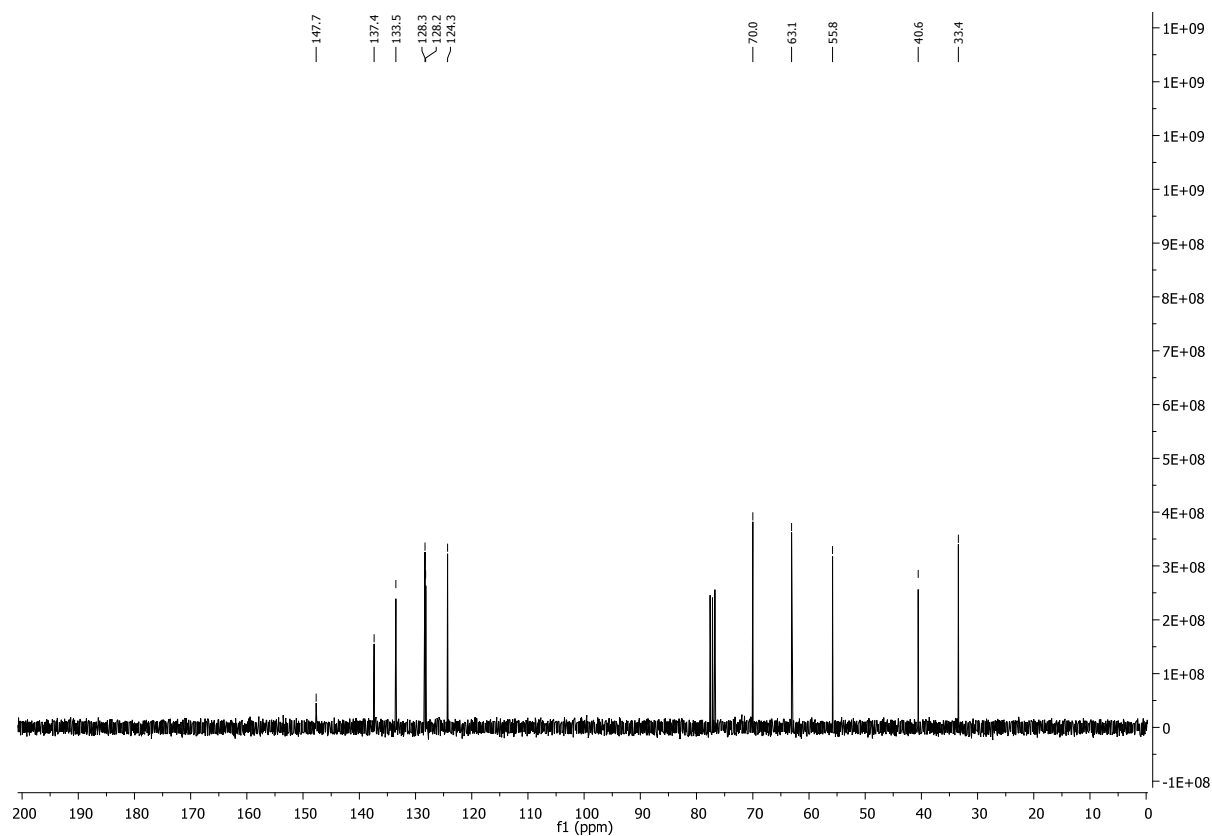

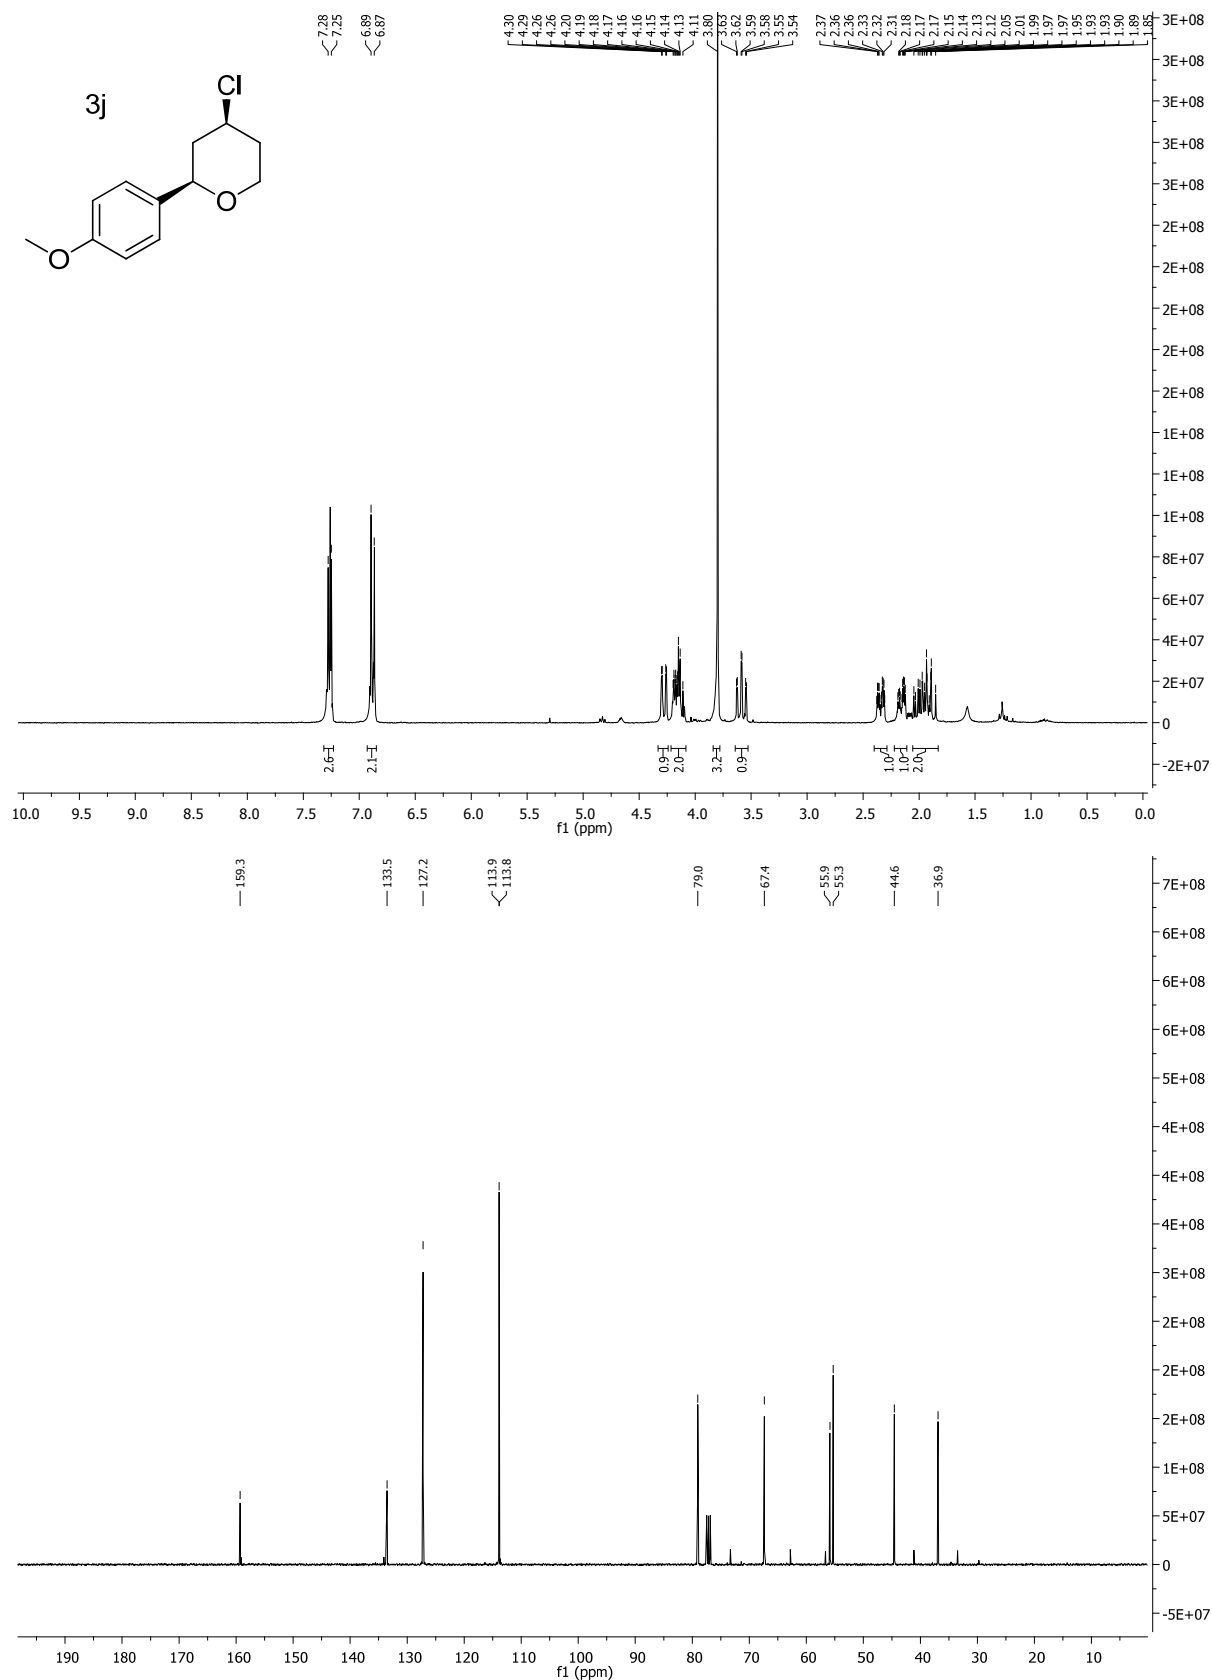

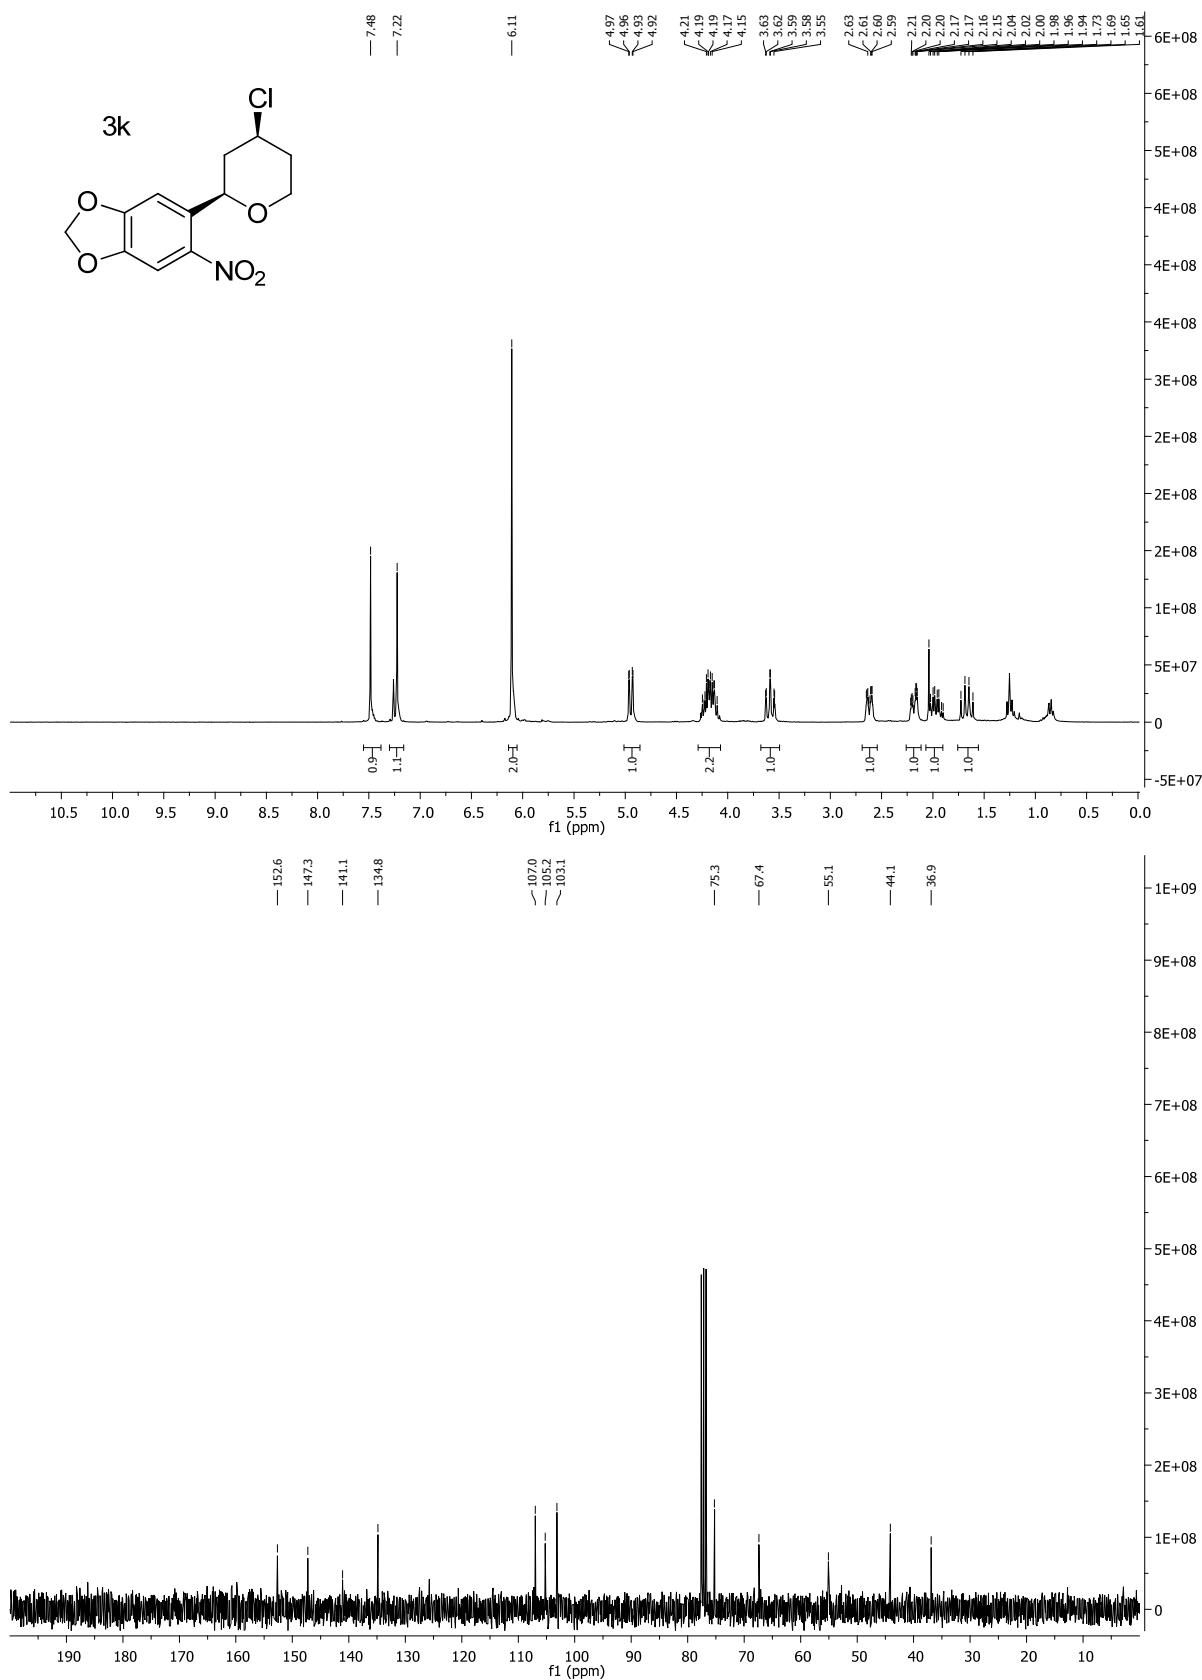

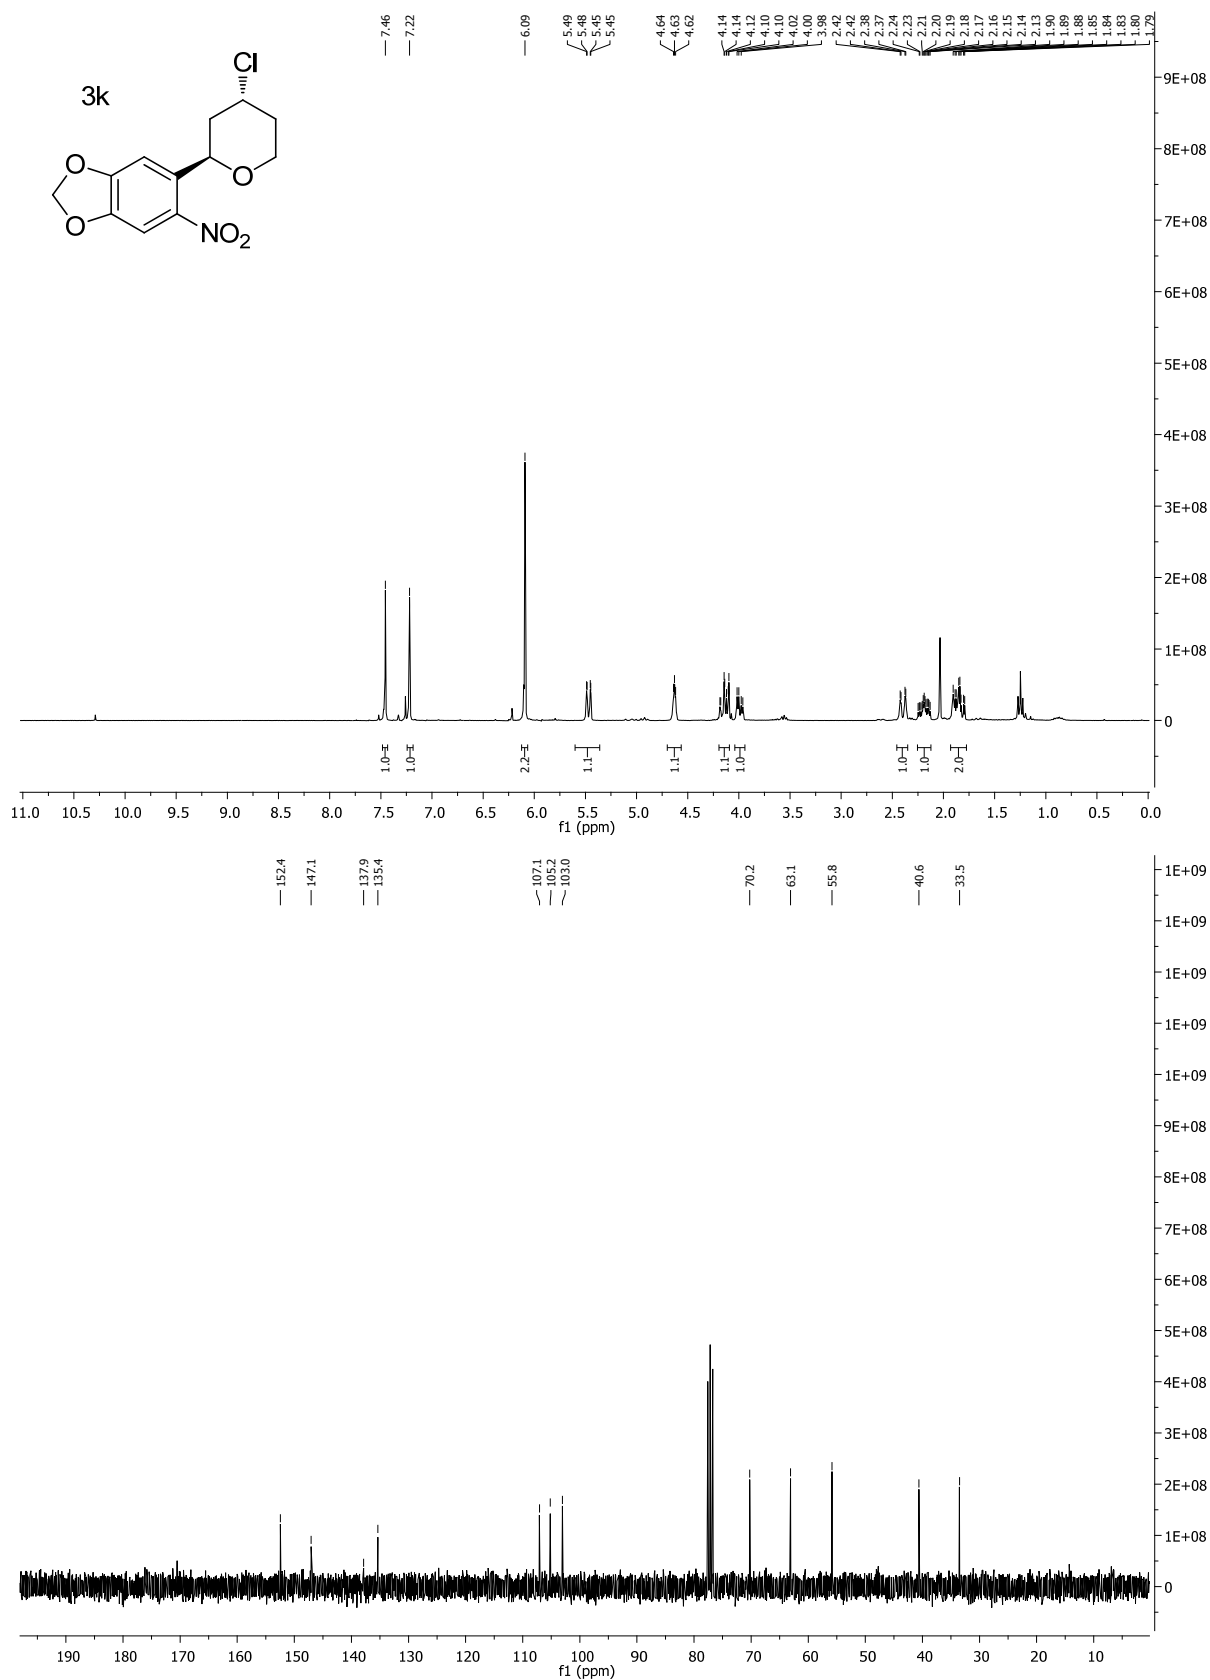

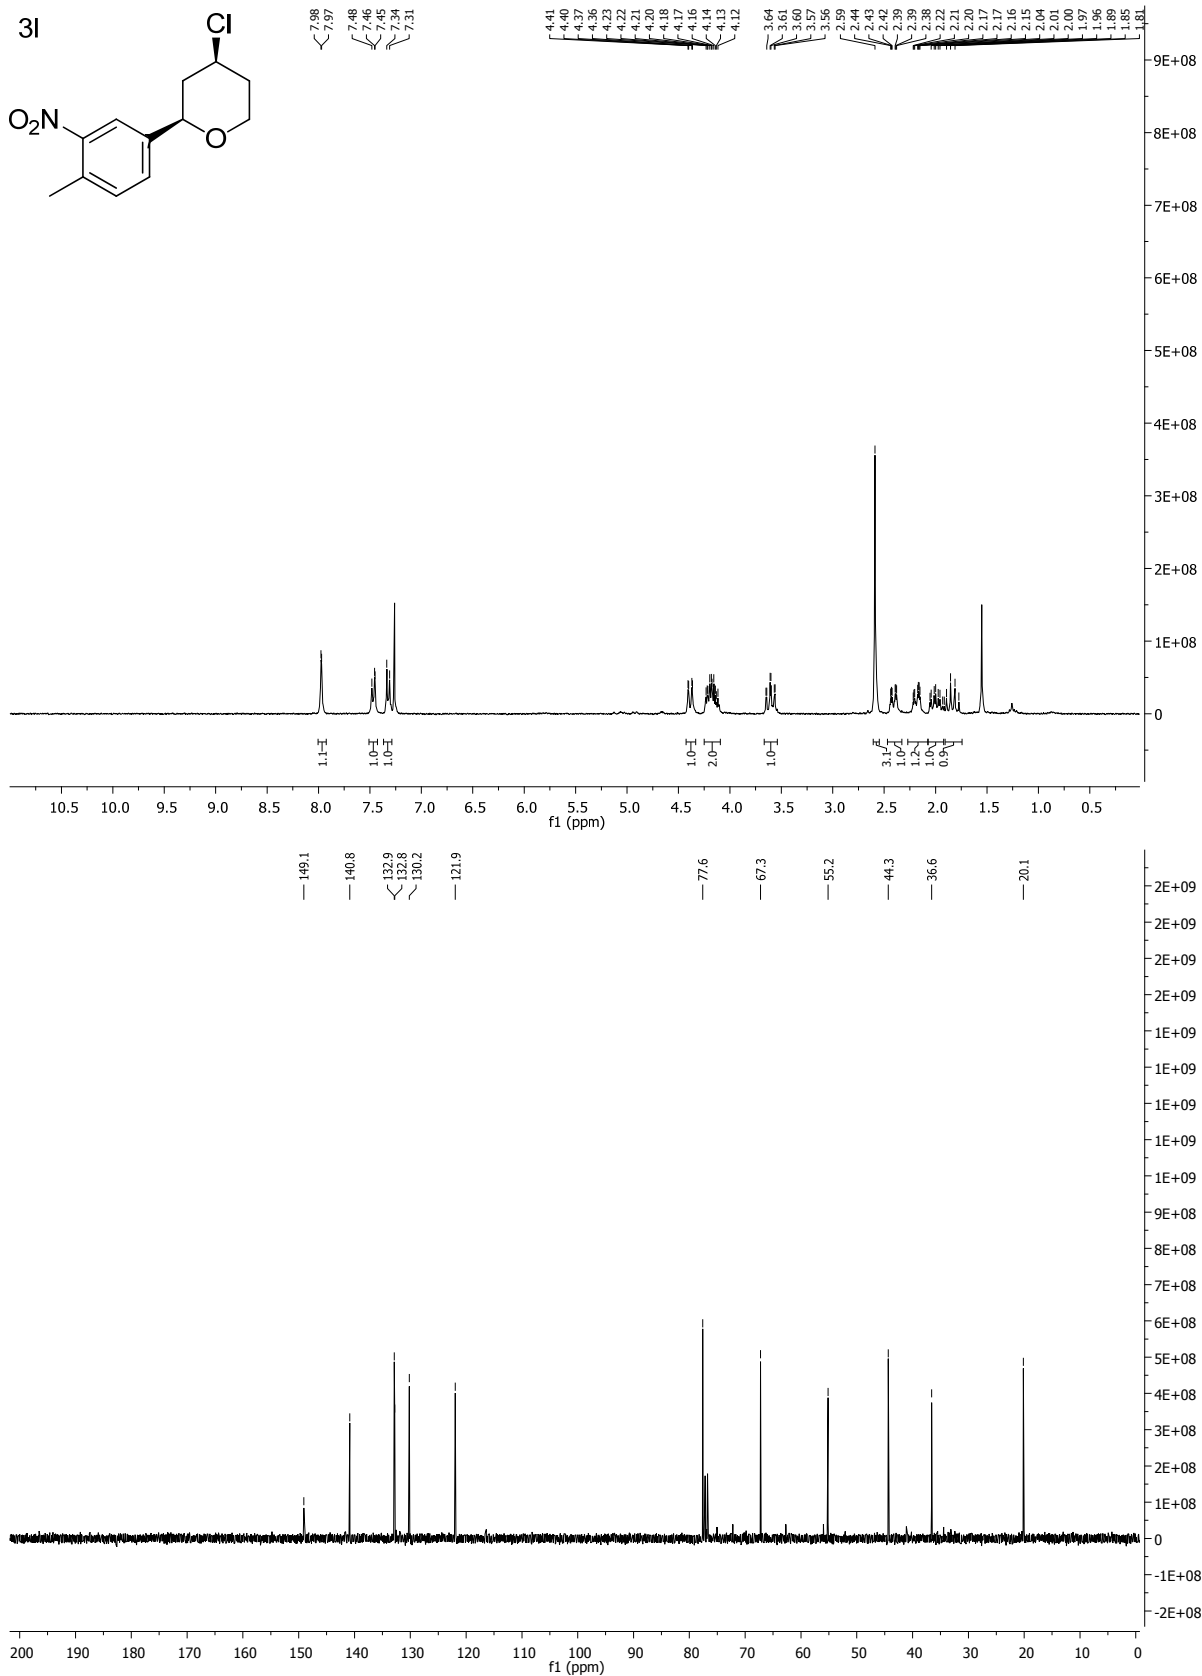

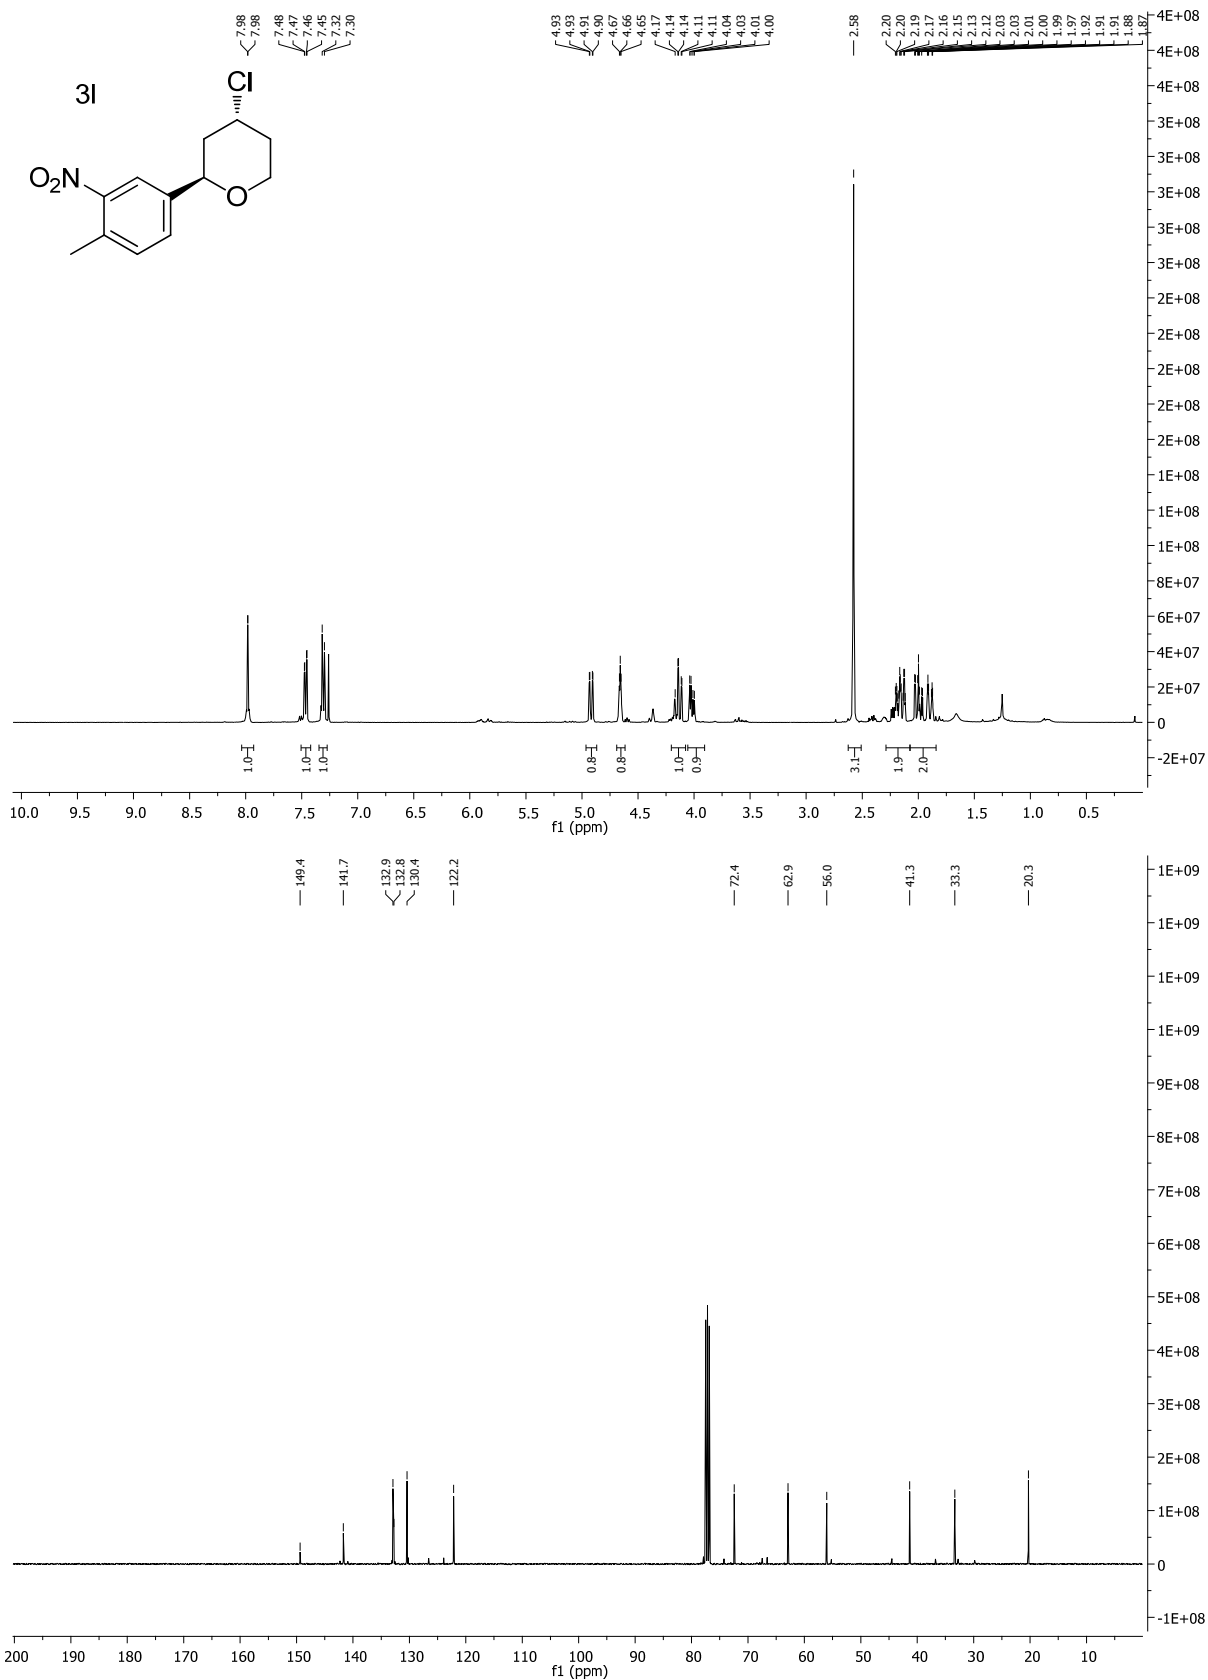

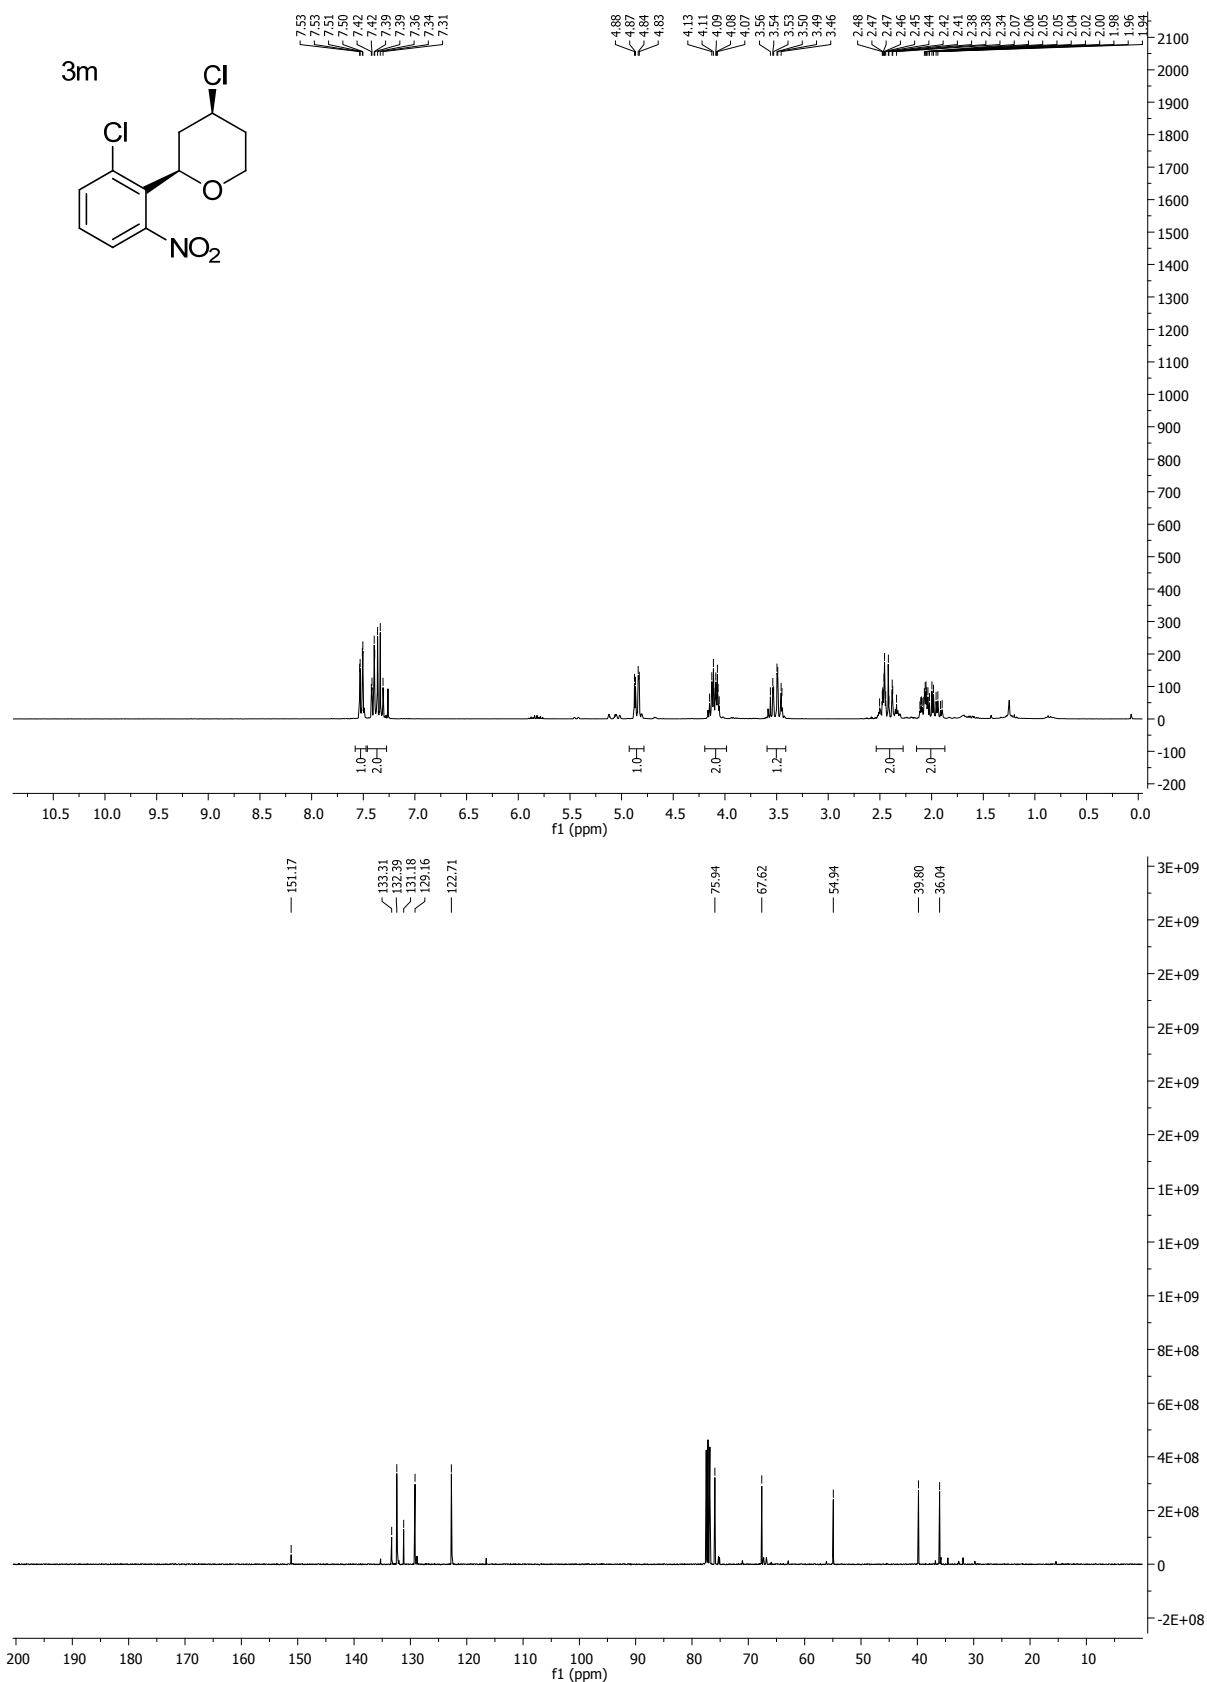



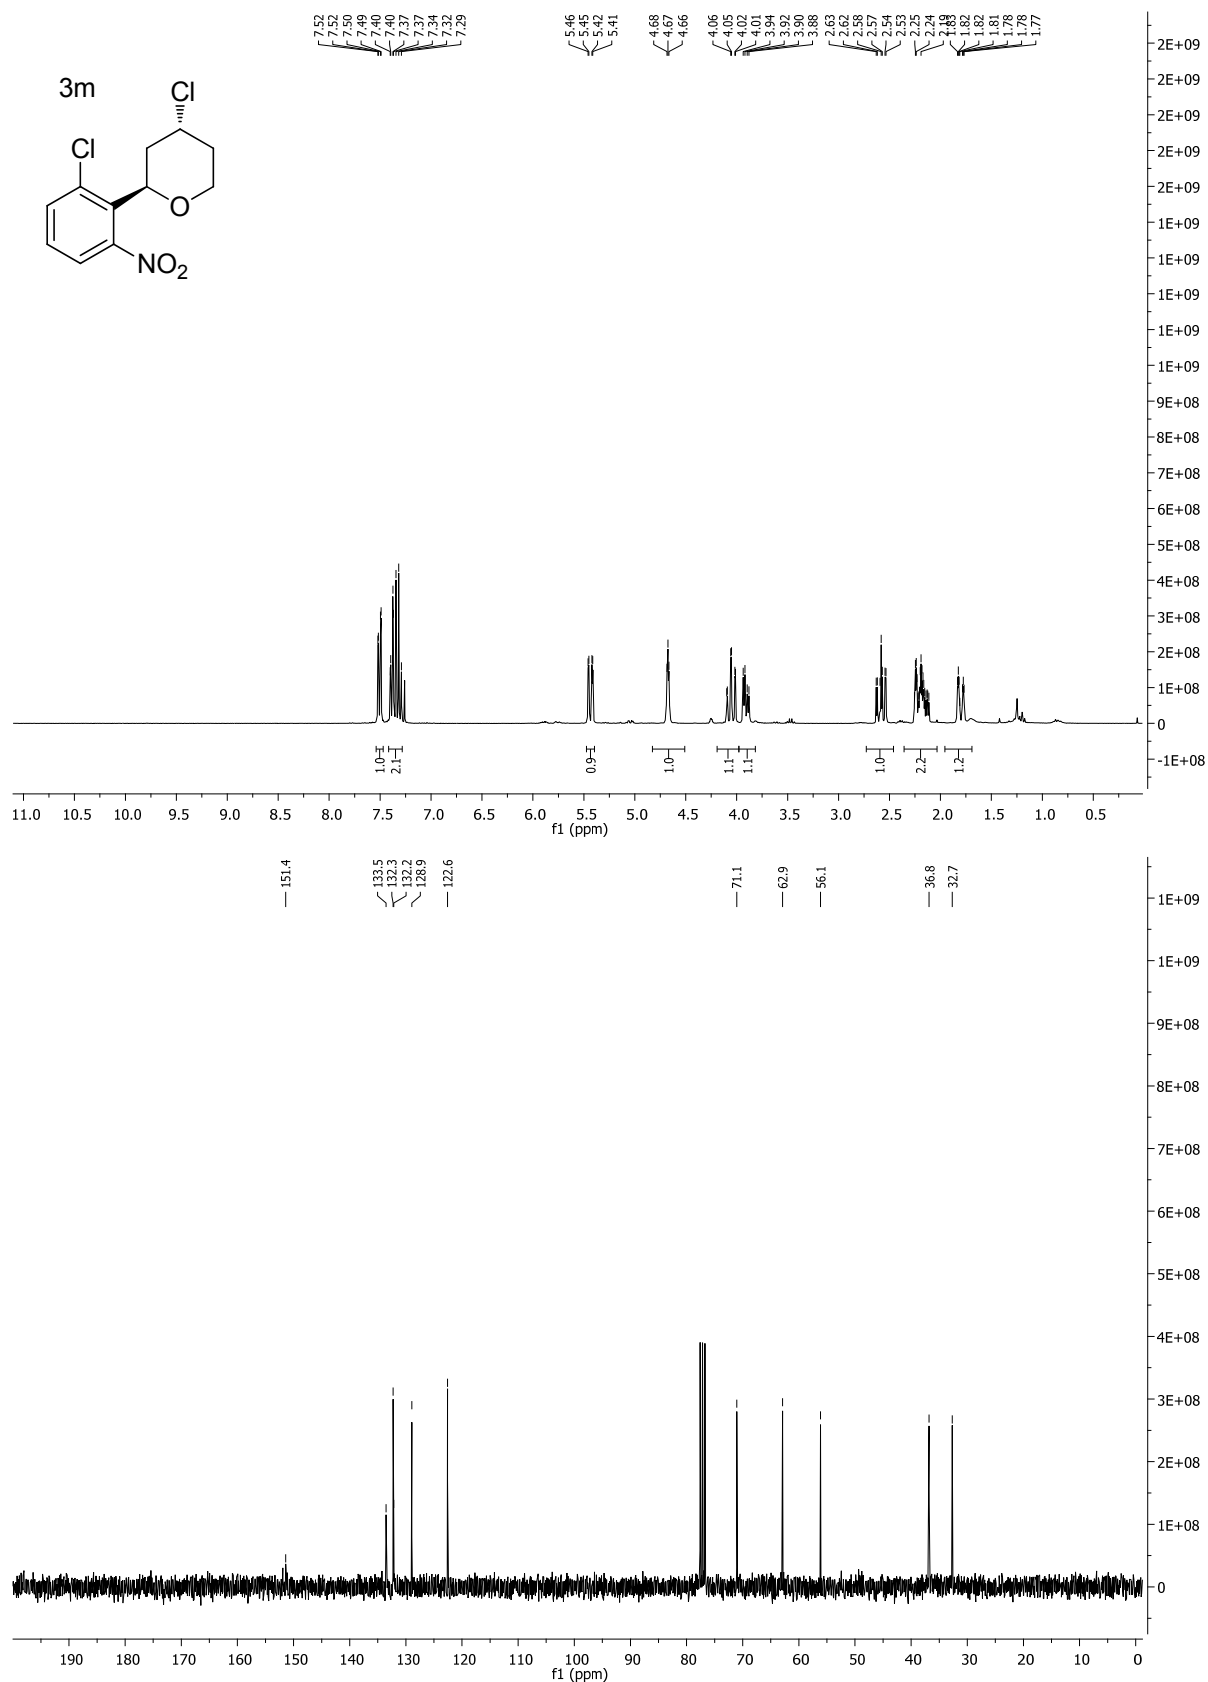

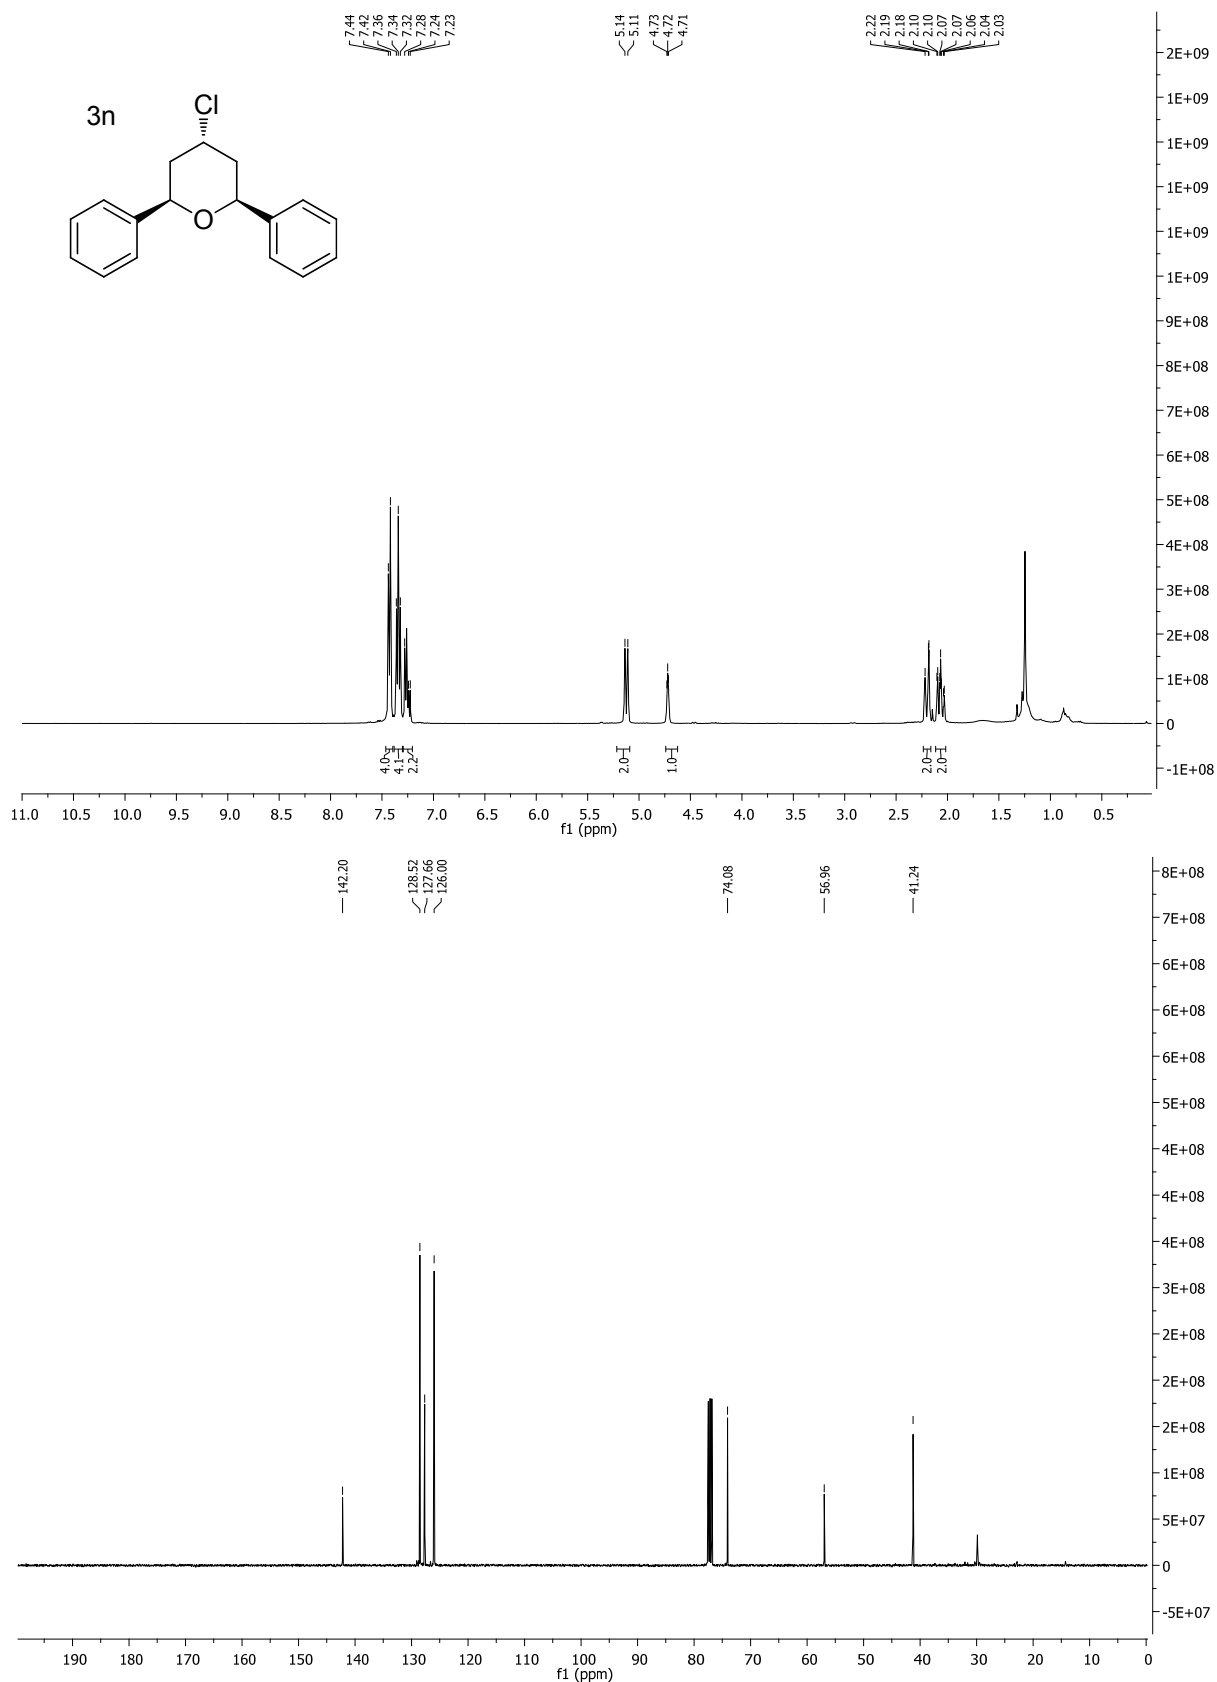

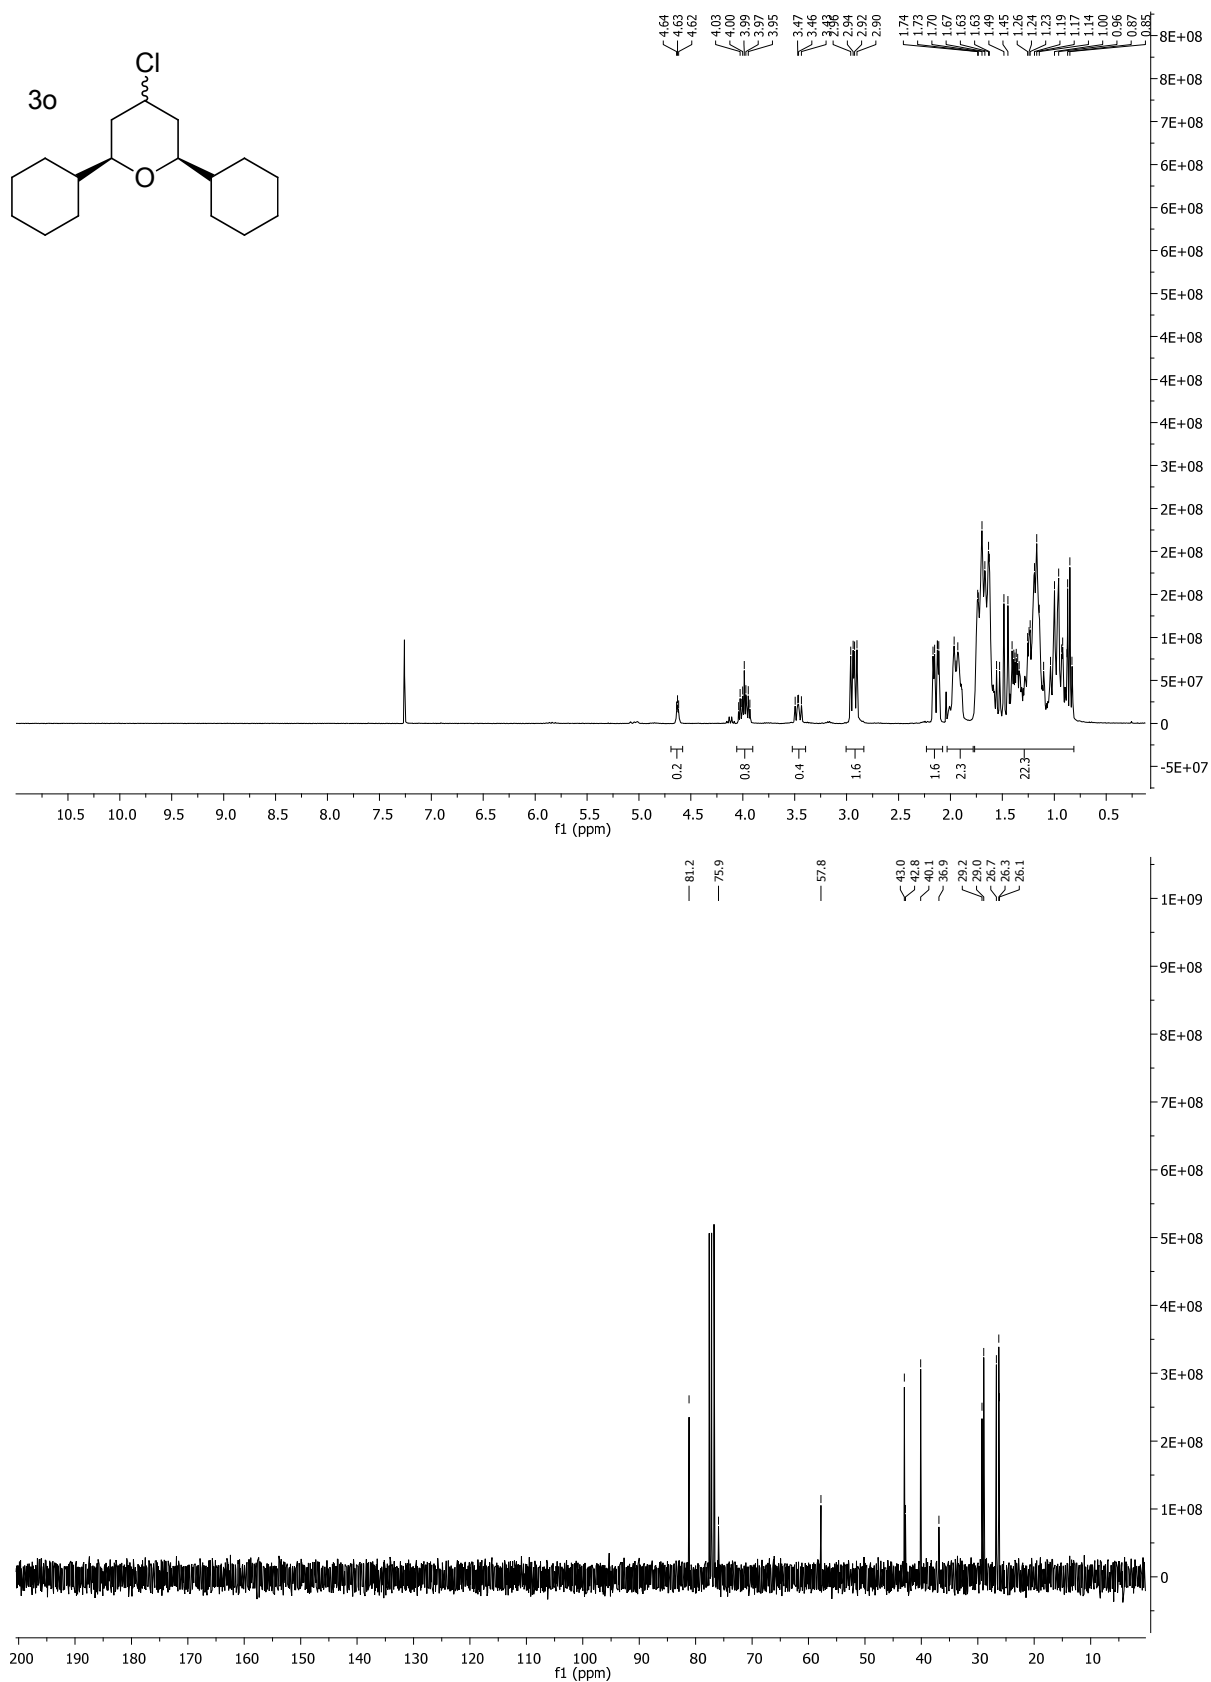

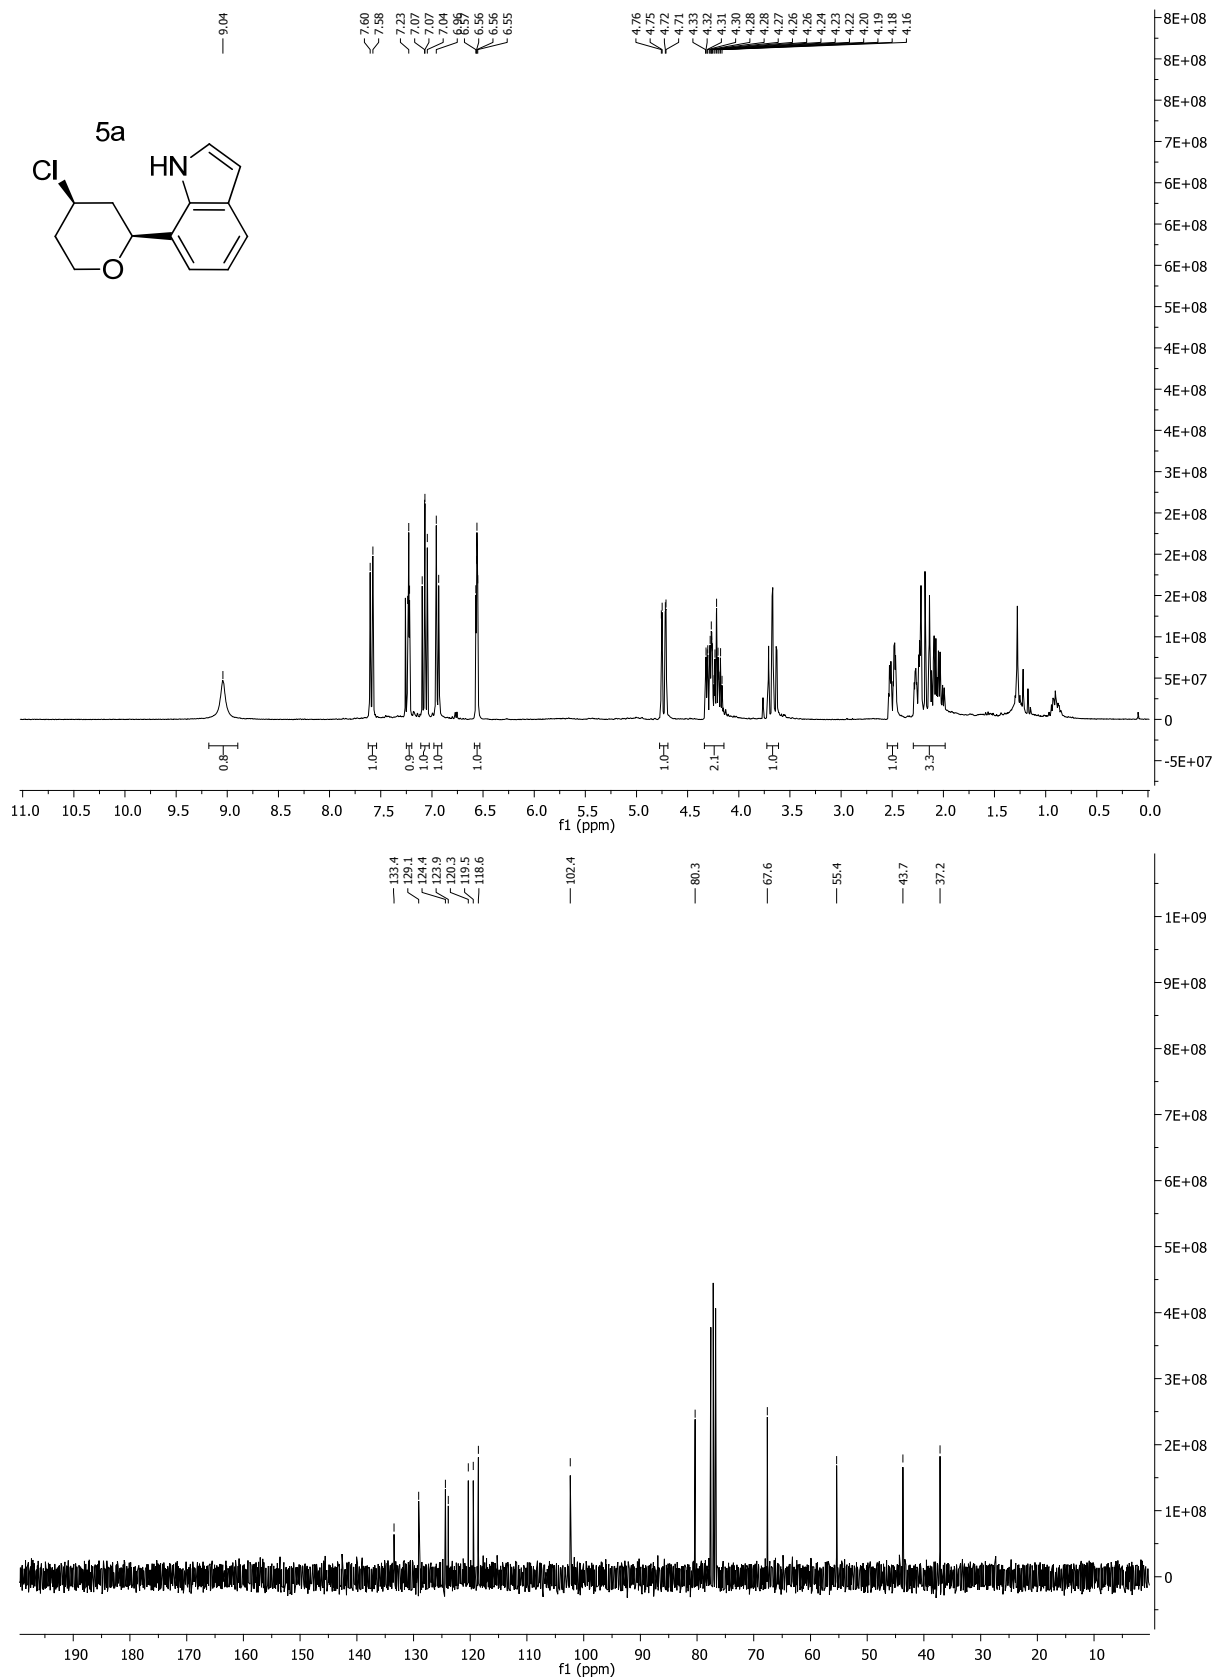

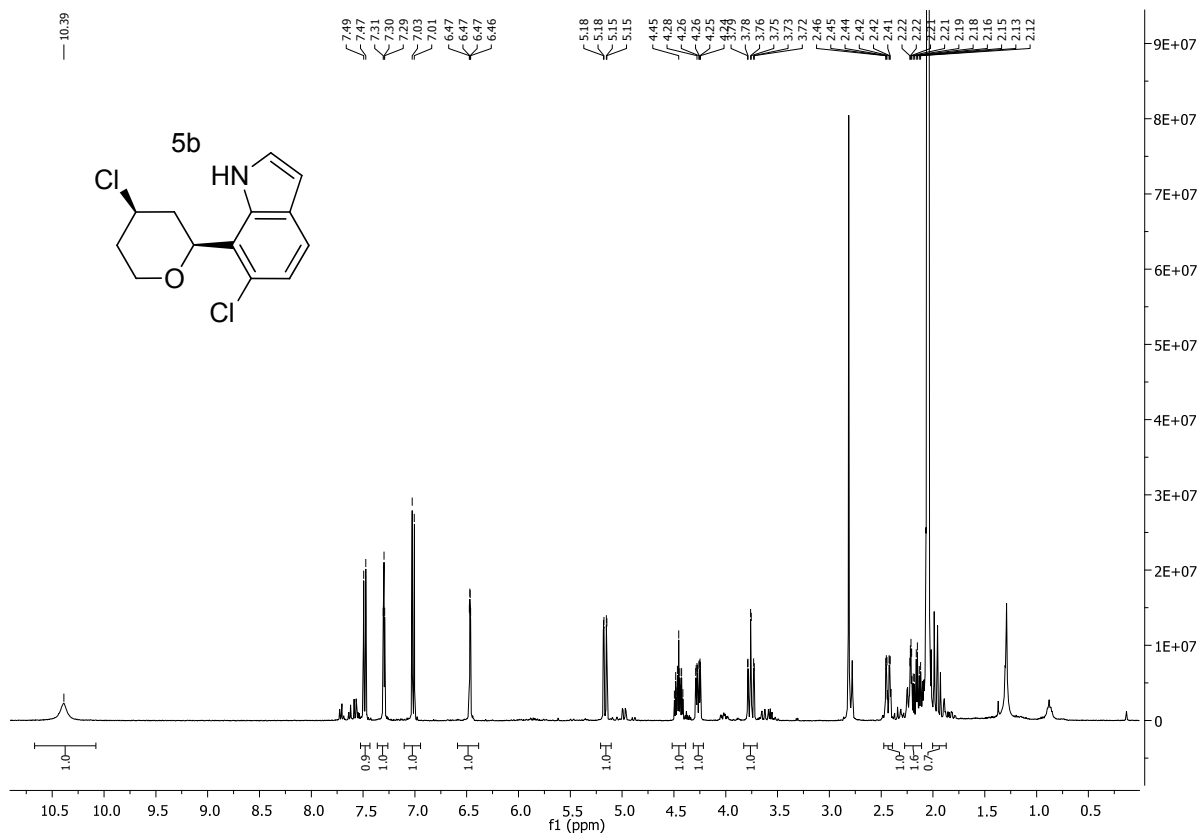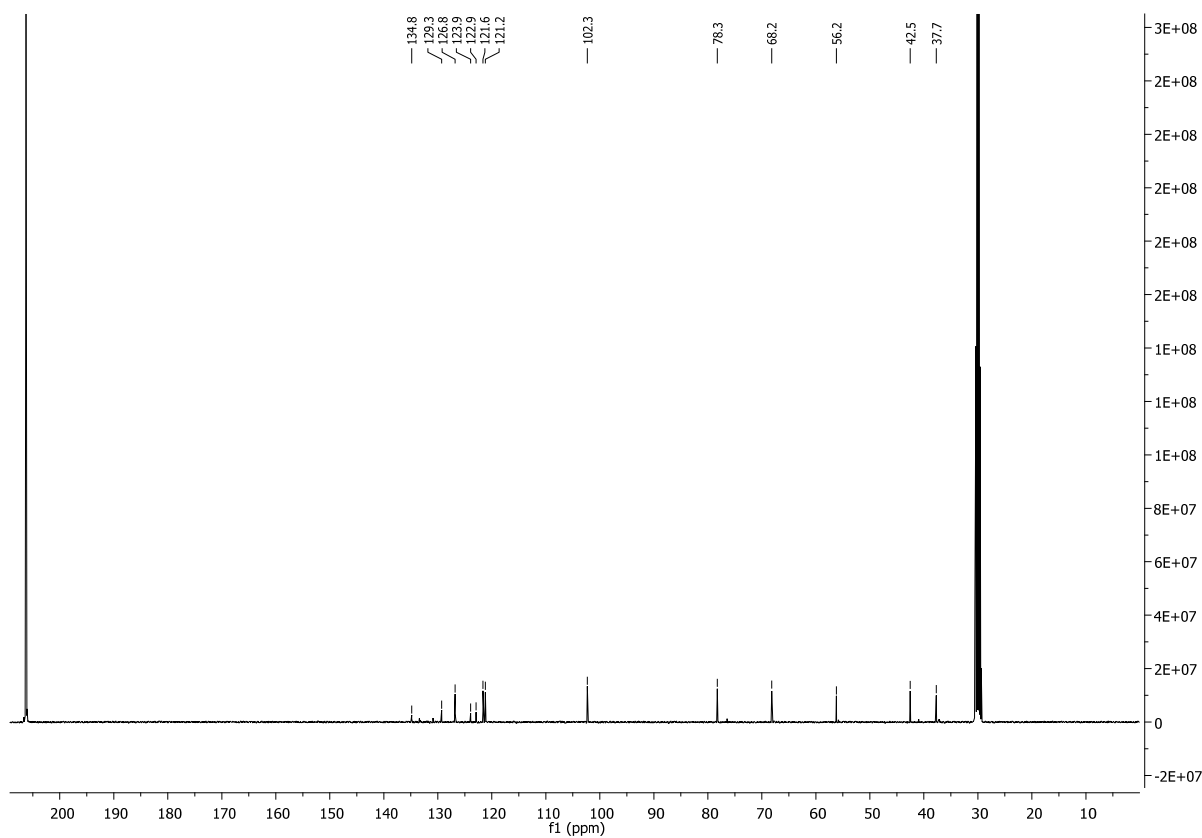

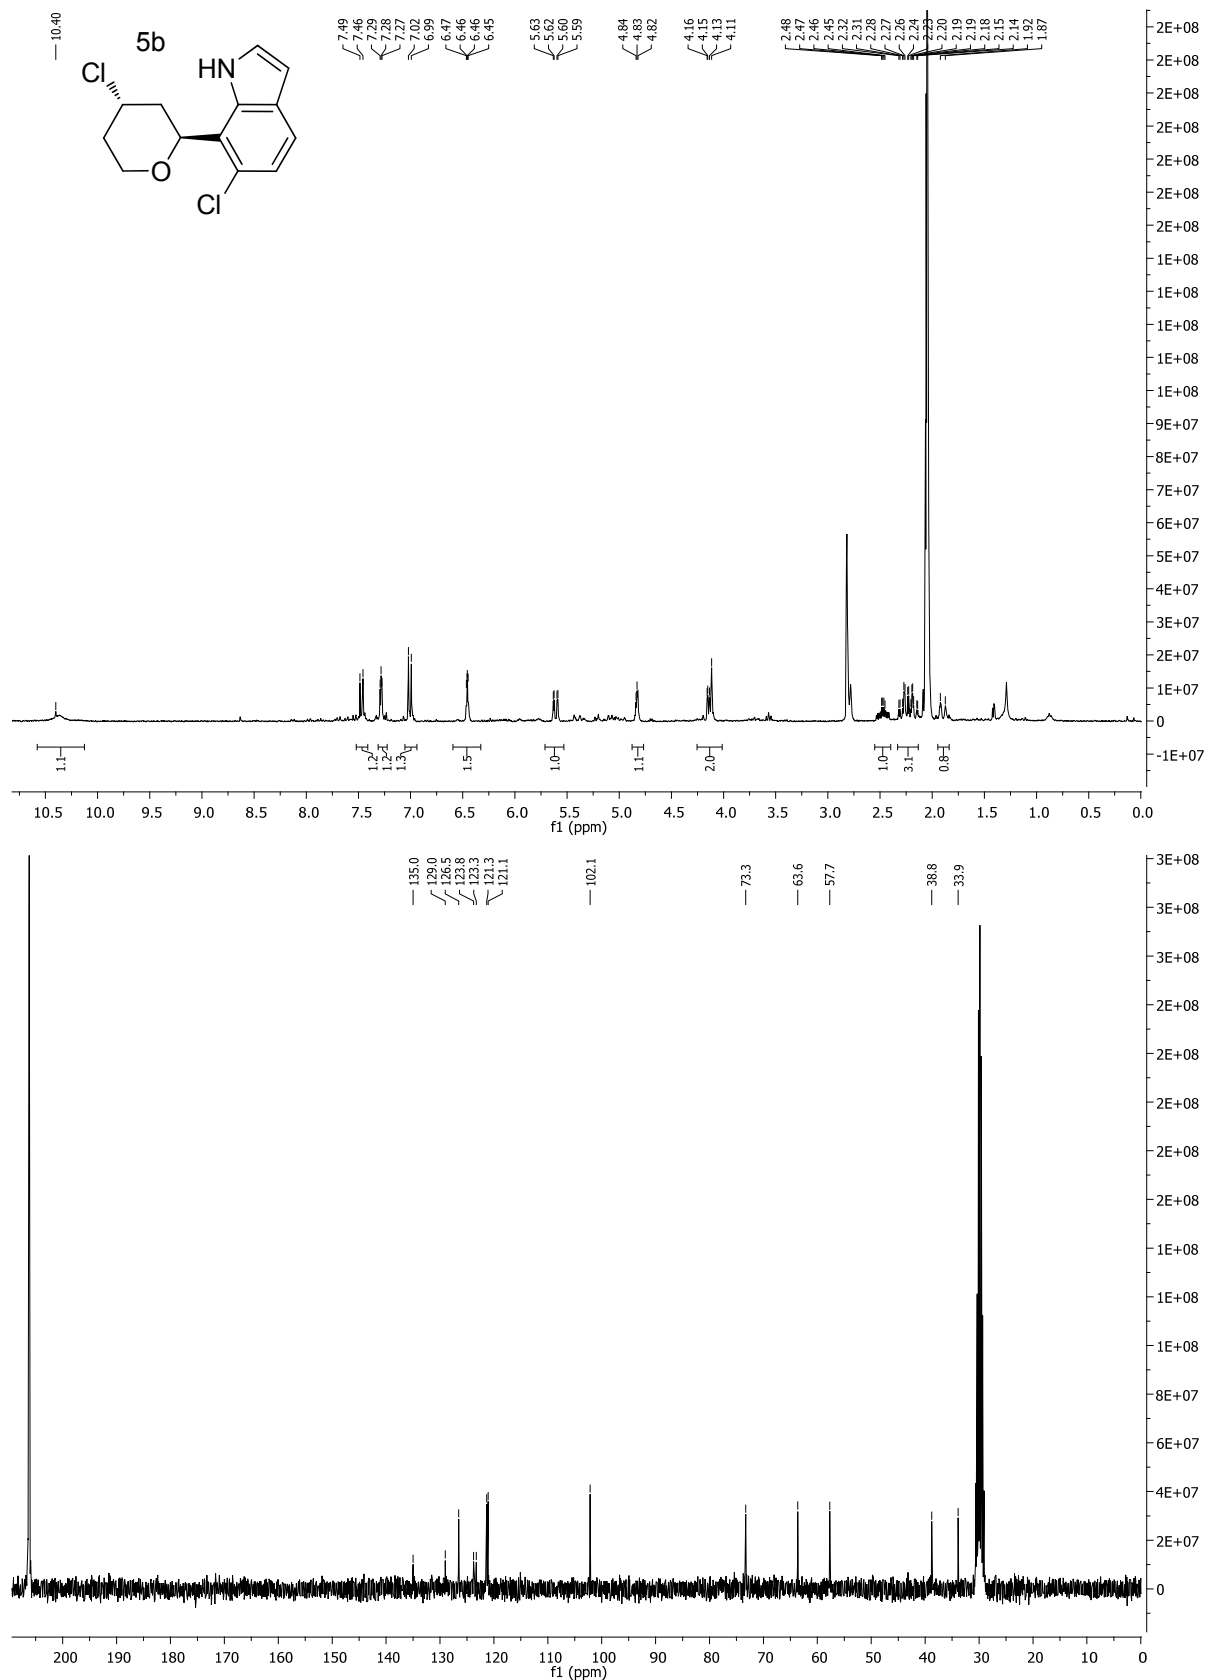

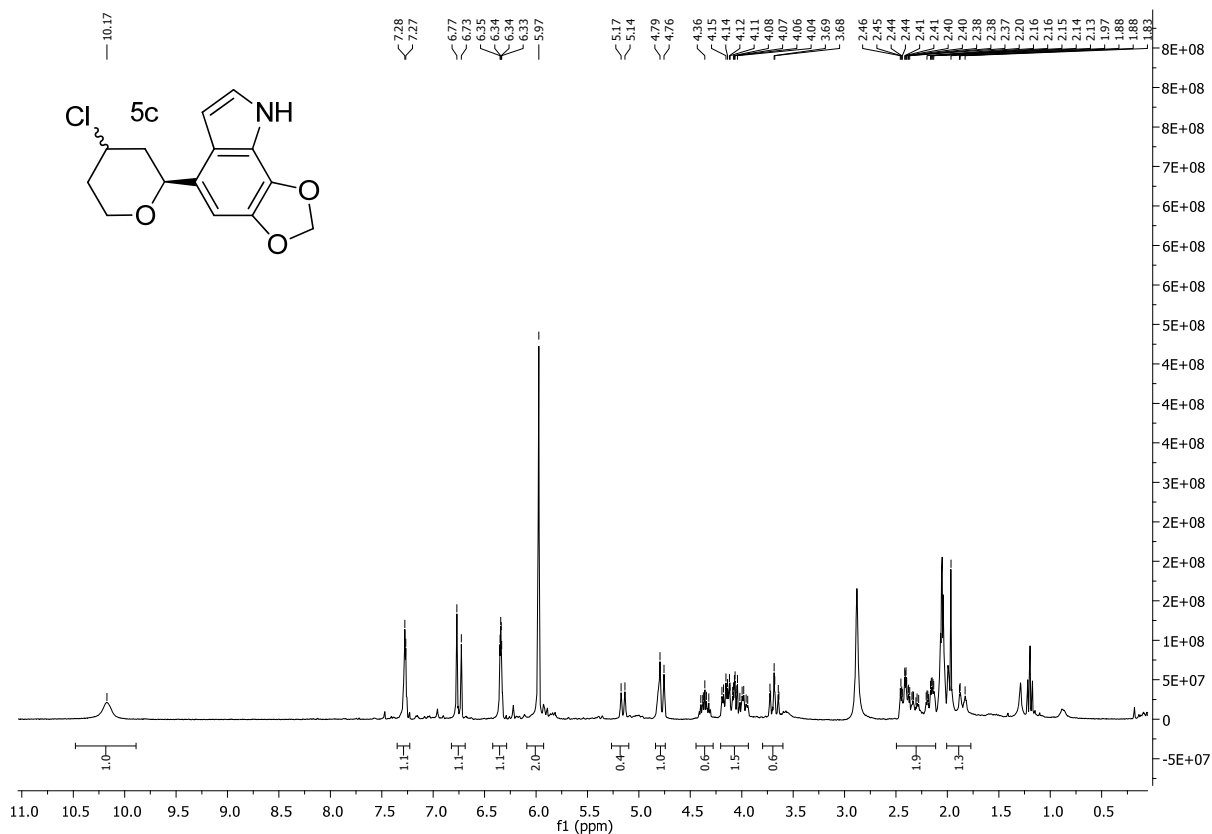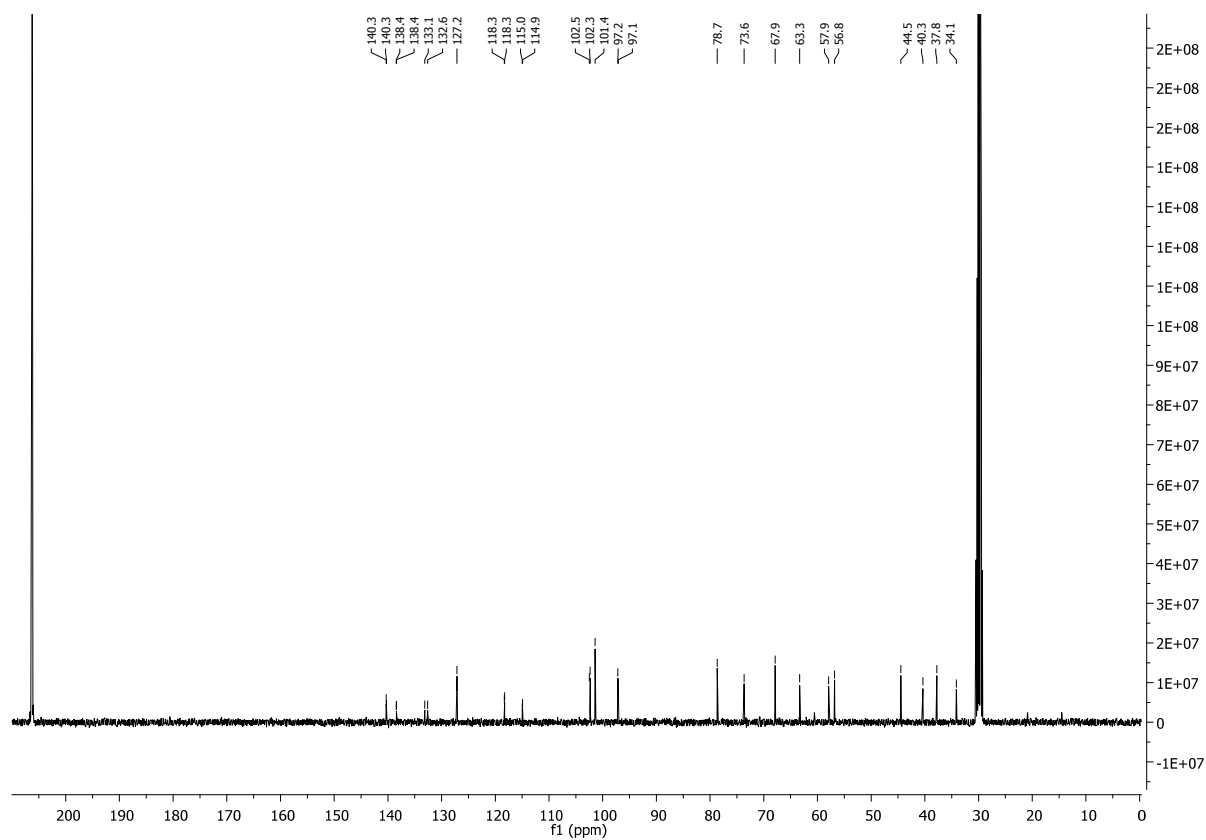

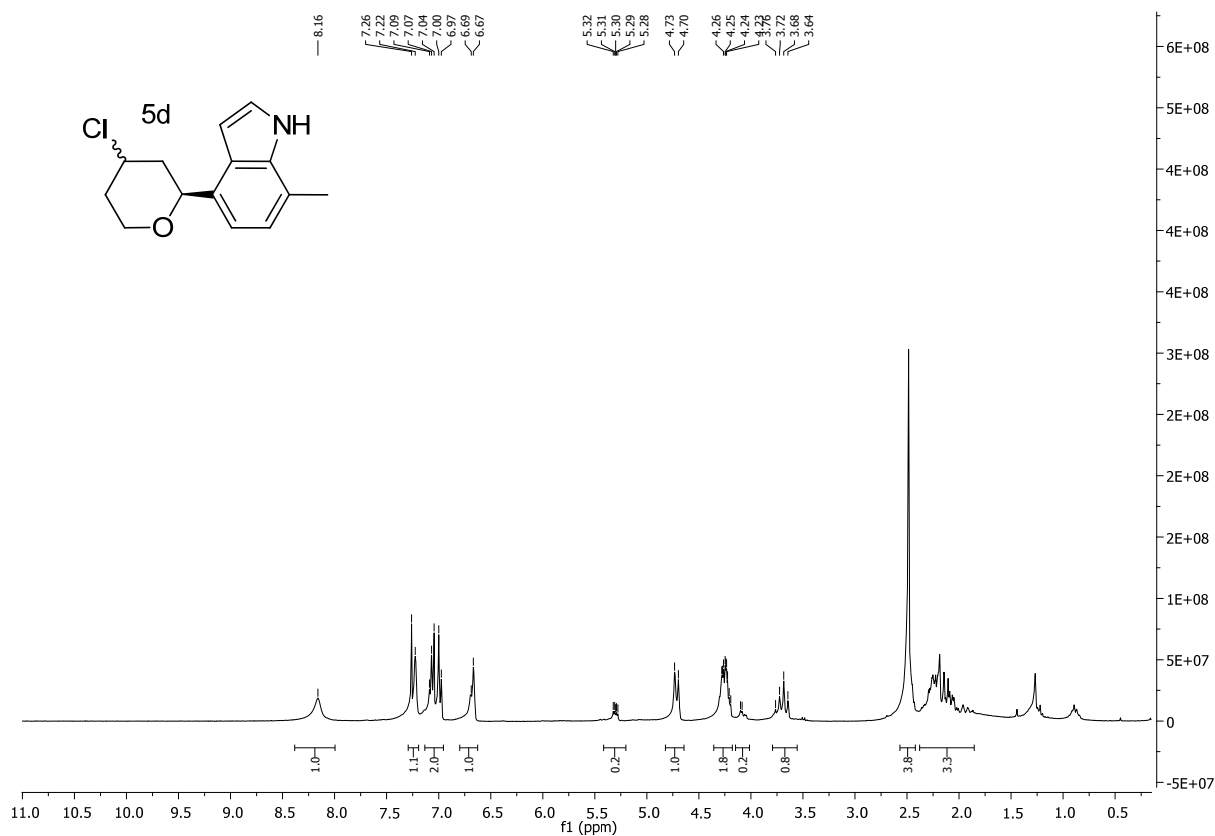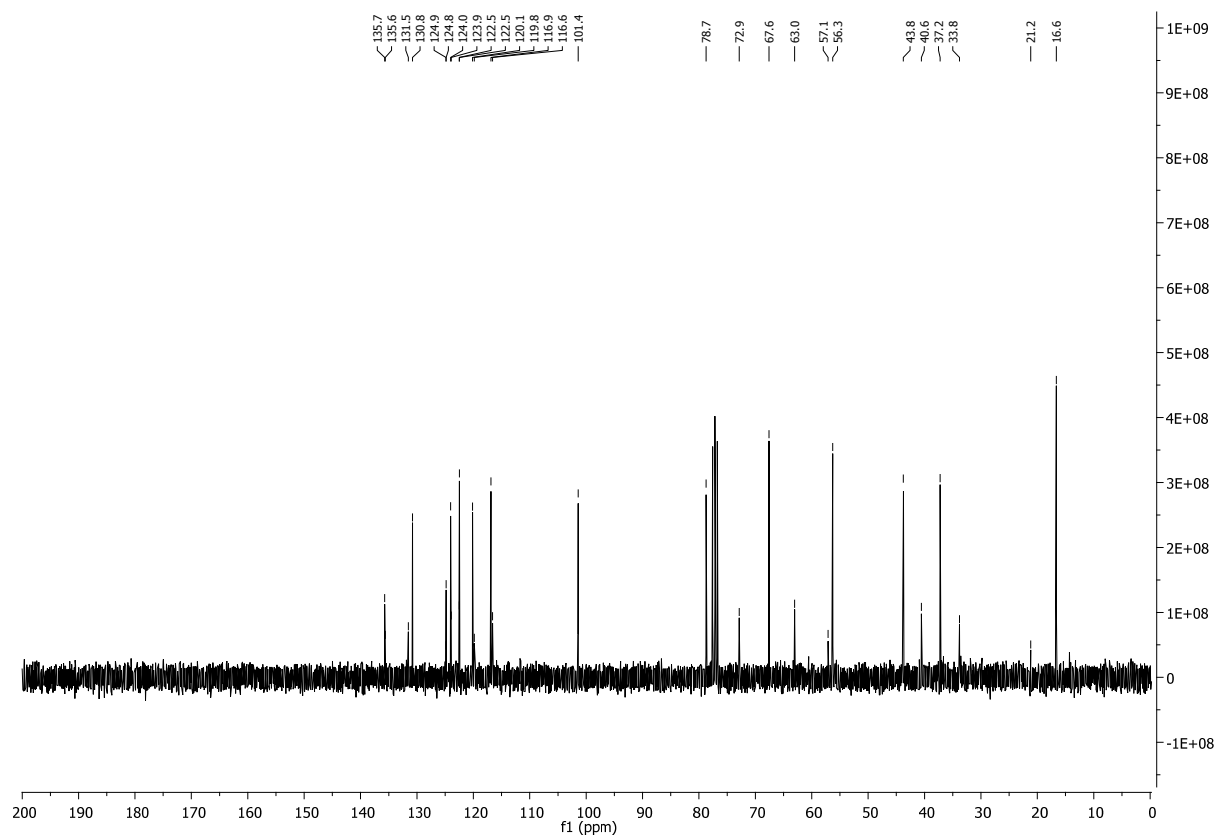



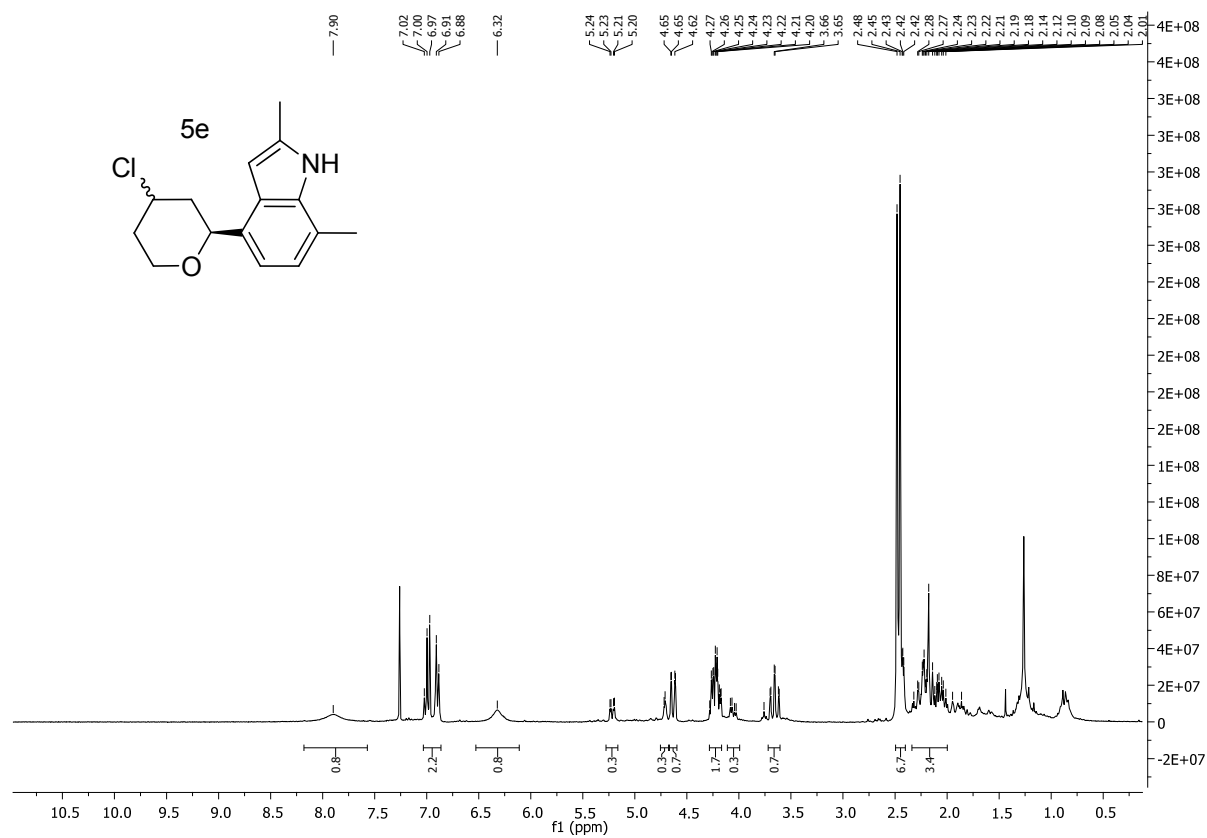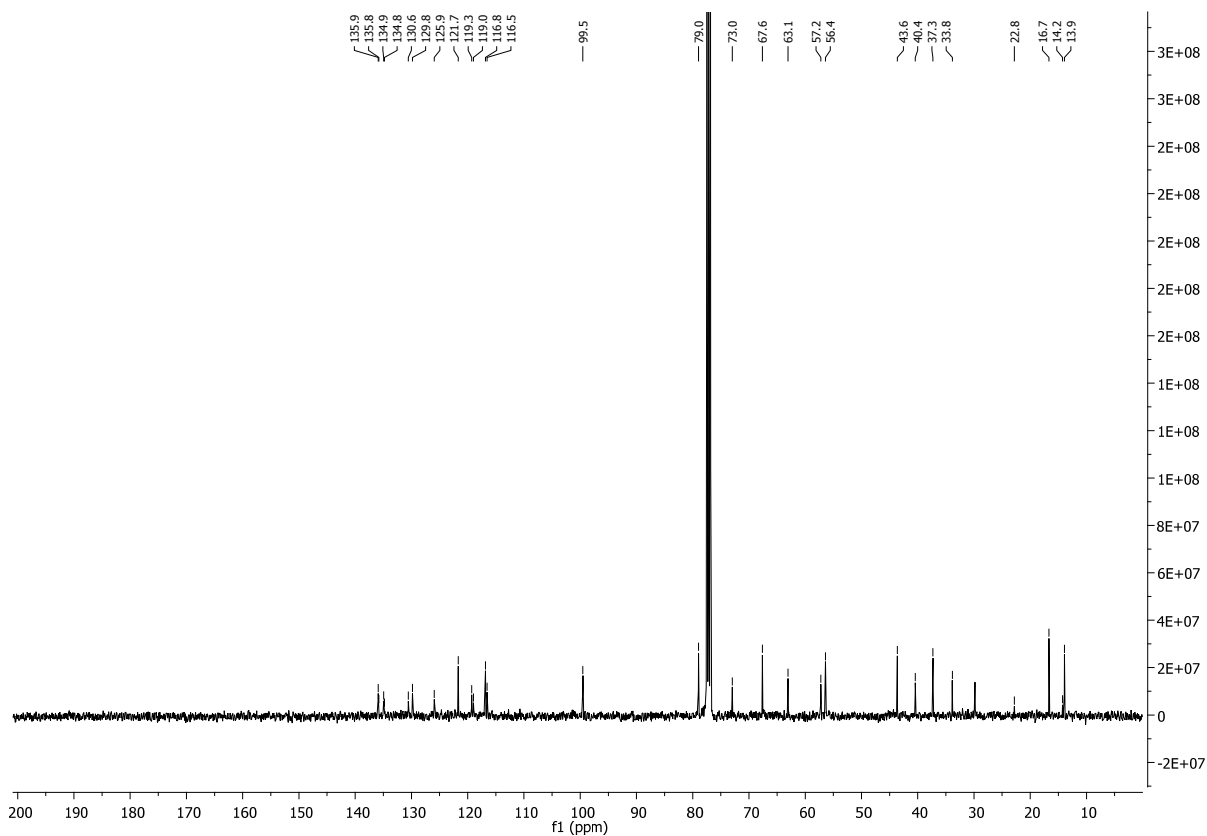

Supplement: c1cc16501a.pdf [file c1cc16501a.pdf]
